# Supplementary material for: Characteristics and Evolution of sill-driven off-axis hydrothermalism in Guaymas Basin – the Ringvent site
Source: PubMed Central journal article supplement (PMC6761151; doi:10.1038/s41598-019-50200-5), 2019-09-25
Supplement: 41598_2019_50200_MOESM1_ESM.pdf [file 41598_2019_50200_MOESM1_ESM.pdf]

## **Supplementary Materials**

### **Characteristics and Evolution of sill-driven off-axis hydrothermalism in Guaymas Basin**

#### **– the Ringvent site**

Andreas Teske, Luke J. McKay, Ana Christina Ravelo, Ivano Aiello, Carlos Mortera, Fernando Núñez-Useche, Carles Canet, Jeffrey P. Chanton, Benjamin Brunner, Christian Hensen, Gustavo A. Ramírez, Ryan J. Sibert, Tiffany Turner, Dylan White, Christopher R. Chambers, Andrew Buckley, Samantha B. Joye, S. Adam Soule, Daniel Lizarralde

## Supplementary Materials

**Previous Ringvent surveys.** Ringvent was first detected when a 2D, NW-SE trending multi-channel seismic (MCS) profile acquired during R/V *Maurice Ewing* cruise EW0210 in 2002 passed ca. 200 m southwest of the ring structure and showed a shallow reflection, later identified as an out-of-plane reflection from a gas horizon under the ring, overlying the uppermost of several sills that are rising in sequence. During a subsequent cruise in 2009 (R/V *Atlantis*, AT15-54), deep-towed sidescan sonar backscatter revealed a ring-shaped (~800 m diameter) pattern of high backscatter, complemented with near-bottom photography at one location (*Lizarralde et al.*, 2011). Ringvent was further explored with R/V *El Puma* (October 7-27, 2014), R/V *Sonne* (June 23 to July 24 2015) and R/V *Alpha Helix* (May13 to June 3, 2016). In addition to the gravity cores obtained during the *El Puma* cruise, the RV *Sonne* cruise (Chief Scientist, Christian Berndt, GEOMAR) collected short sediment cores and seafloor grab samples, which recovered silicate (diatomaceous sinter) and carbonate (fine-grained aragonite) minerals at Ringvent (*Núñez-Useche et al.*, 2018). The RV *Alpha Helix* cruise (Chief scientist, Antonio González Fernández, CICESE) obtained a new set of MCS profiles across the circular seafloor structure; the profiles AH01-02 and AH21-22 running parallel northwest to southeast intersected at right angles with profile AH26-27, with crossing points located just southwest and within the circular structure. These profiles indicated free gas concentrated beneath the ring ~100 m below the seafloor (mbsf) and an underlying sill horizon at ~200 mbsf. The accumulating evidence for sill-driven gas flow at Ringvent prompted *Alvin* dives at this location during R/V *Atlantis* Expedition AT37-06 in December 2016, when extraneous factors disrupted ongoing work at the southern hydrothermal spreading center of Guaymas Basin and alternate dive sites had to be improvised quickly.

## Supplementary References

Lizarralde, D., Soule, A., Seewald, J., and Proskurowski, G. Carbon release by off-axis magmatism in a young sedimented spreading centre. *Nature Geoscience* **4**, 50–54 (2011).

Núñez-Useche, F., Canet, C., Liebetrau, V., di Puig, T., Ponciano, A.C., Alonso, P., Berndt, C., Hensen, C., Mortera-Gutierrez, C., and Rodríguez-Díaz, A. A. Redox conditions and authigenic mineralization related to cold seeps in central Guaymas Basin, Gulf of California. *Marine and Petroleum Geology* **95**, 1-15 (2018).

## Supplementary figures

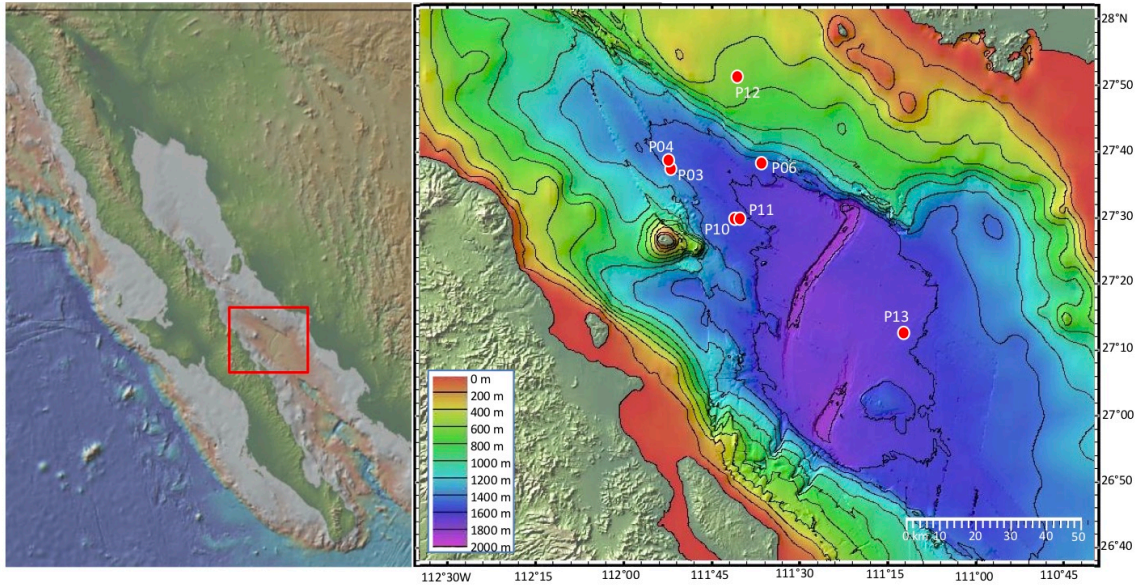

**Supplementary Figure 1.** Location of Guaymas Basin in the Gulf of California (red rectangle in left panel), and location of El Puma coring sites in the bathymetric map of Guaymas Basin (right panel). The northern and southern spreading centers and their axial troughs reach depths of 2000 m, marked in purple, and are surrounded by extensive ridge flanks in the Northwest and Southeast that gradually rise to ca. 1600 m depth.

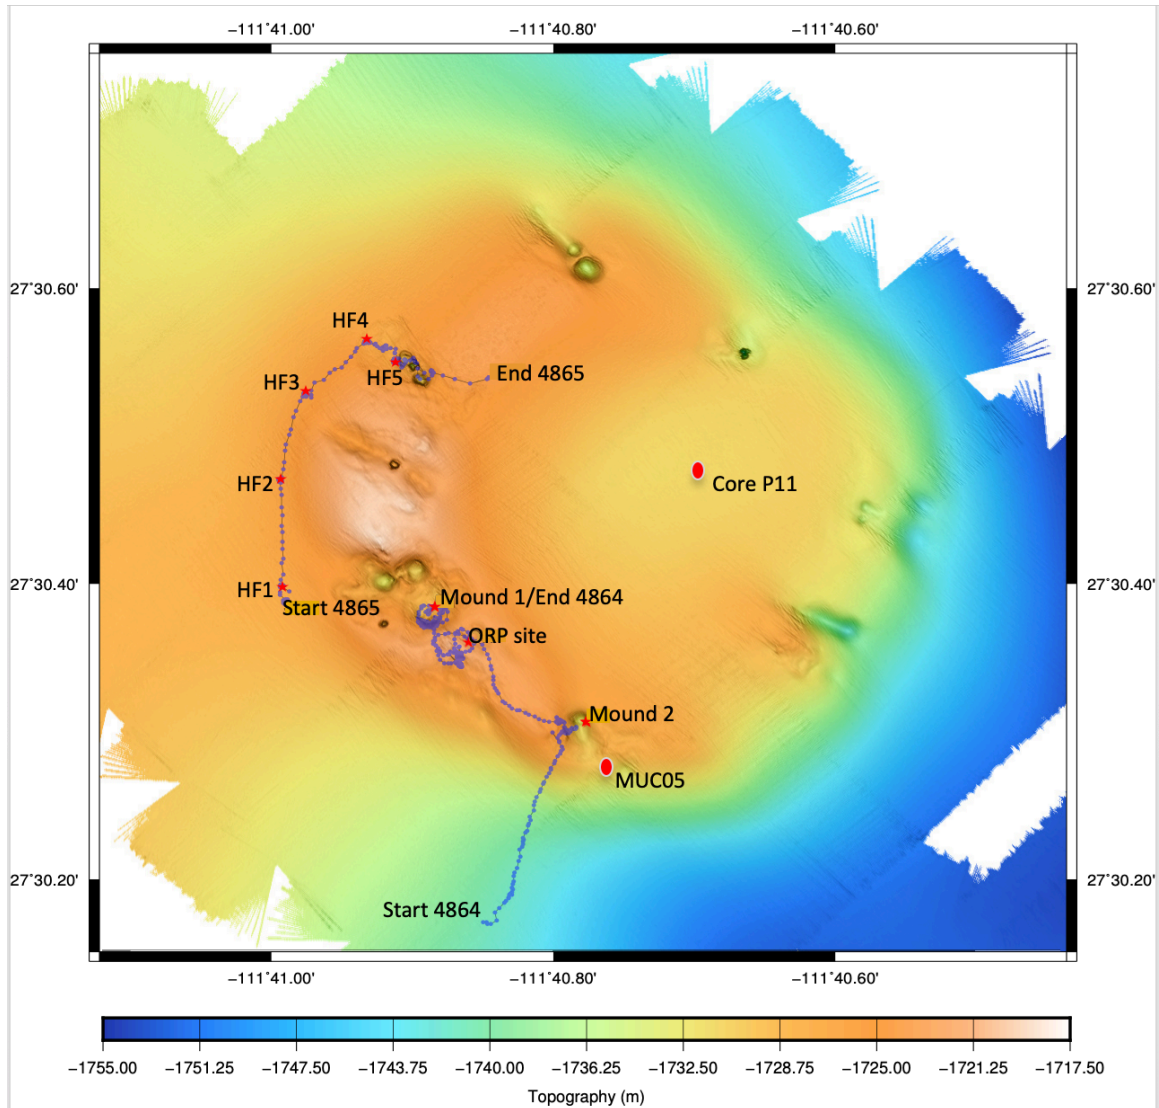

**Supplementary Figure 2. Contour-shaded bathymetry** from *Sentry* dive 410 annotated with *Alvin* sampling locations, *El Puma* core P11 location, the location of MUC05 (Geilert et al. 2018), *Alvin* dive tracks, and thermal profiling locations during *Alvin* dives 4864 and 4865. *Alvin* push cores 4864-10 and 4864-12 were taken at the Mound 1 site. Seafloor mineral samples shown in Figure 3 and Supplemental Figure 6 were collected at the ORP and Mound 1 sites.

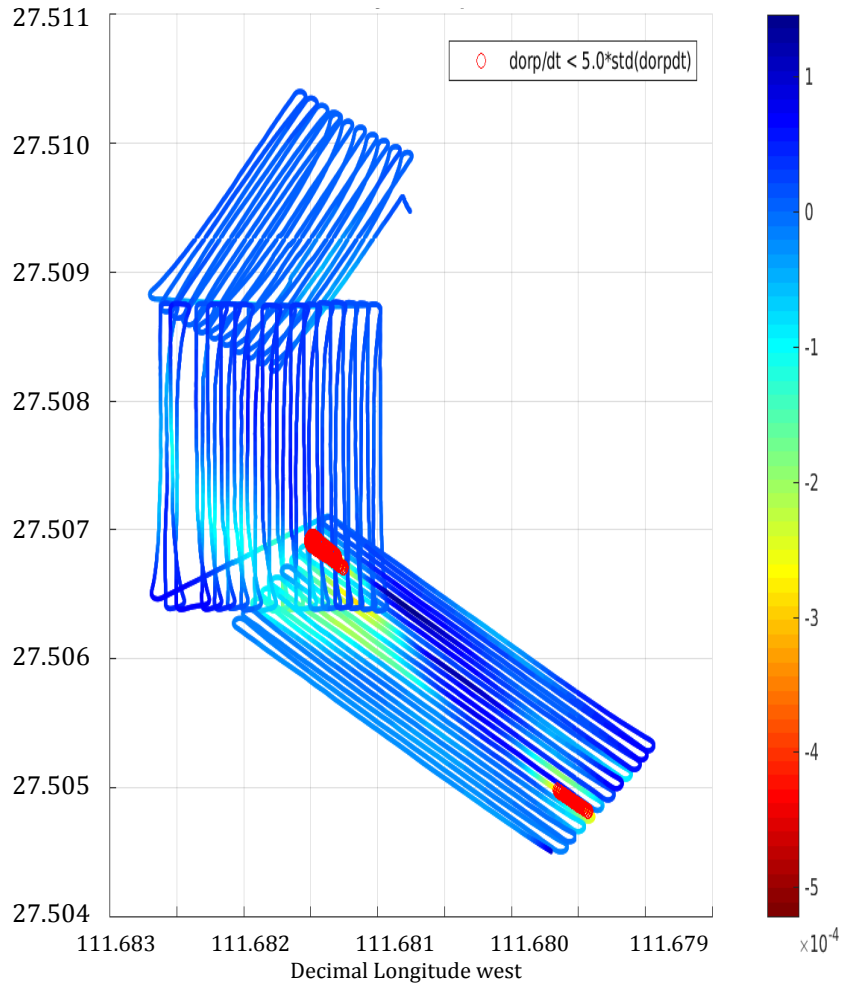

**Supplementary Figure 3.** ORP sensor data [ $\delta_{orp}/\delta t$ ] measured ca. 6 m above the seafloor during *Sentry* Dive 411. The grid covers the western half of Ringvent. Comparison with the bathymetric map in Supplementary Figure 2 shows that the anomalies are located near the Mound 2 area at the southern edge, and at the ORP site and Mound 1 area on the southwestern ring segment. Grid positions are given in decimal latitude and longitude.



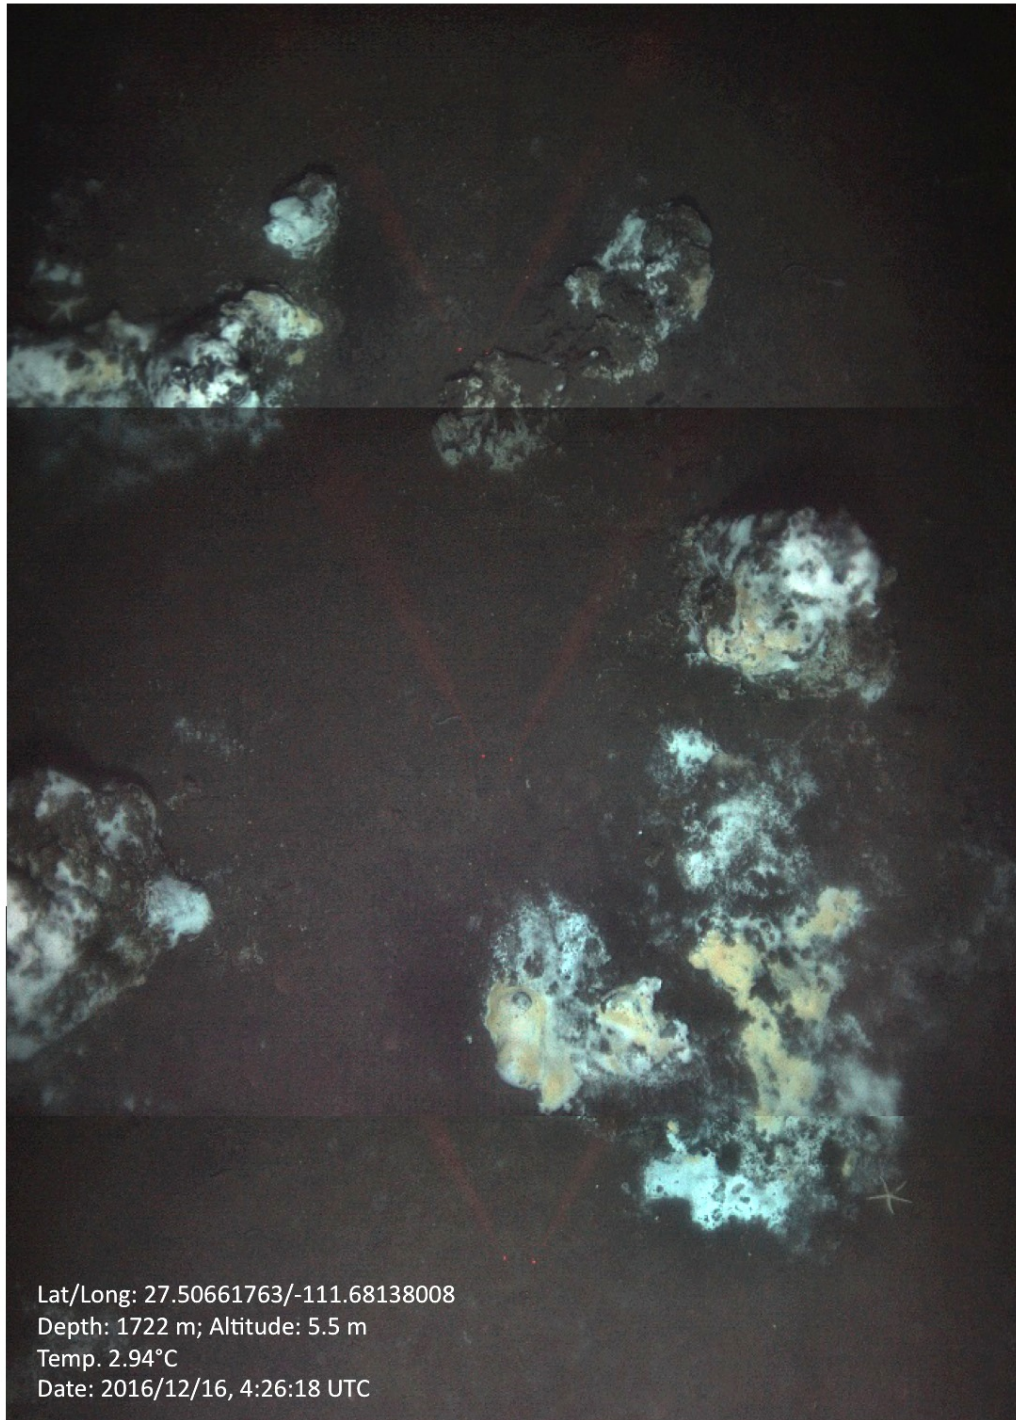

**Supplementary Figure 4A.** Photomosaic of white and yellow sulfur-oxidizing bacterial mats on sediment and small rocky outcrops, from *Sentry* dive 411 on the western ridge of Ringvent, performed at night between *Alvin* dives 4864 and 4865. Three adjacent overlapping photos were fitted together for this panel.

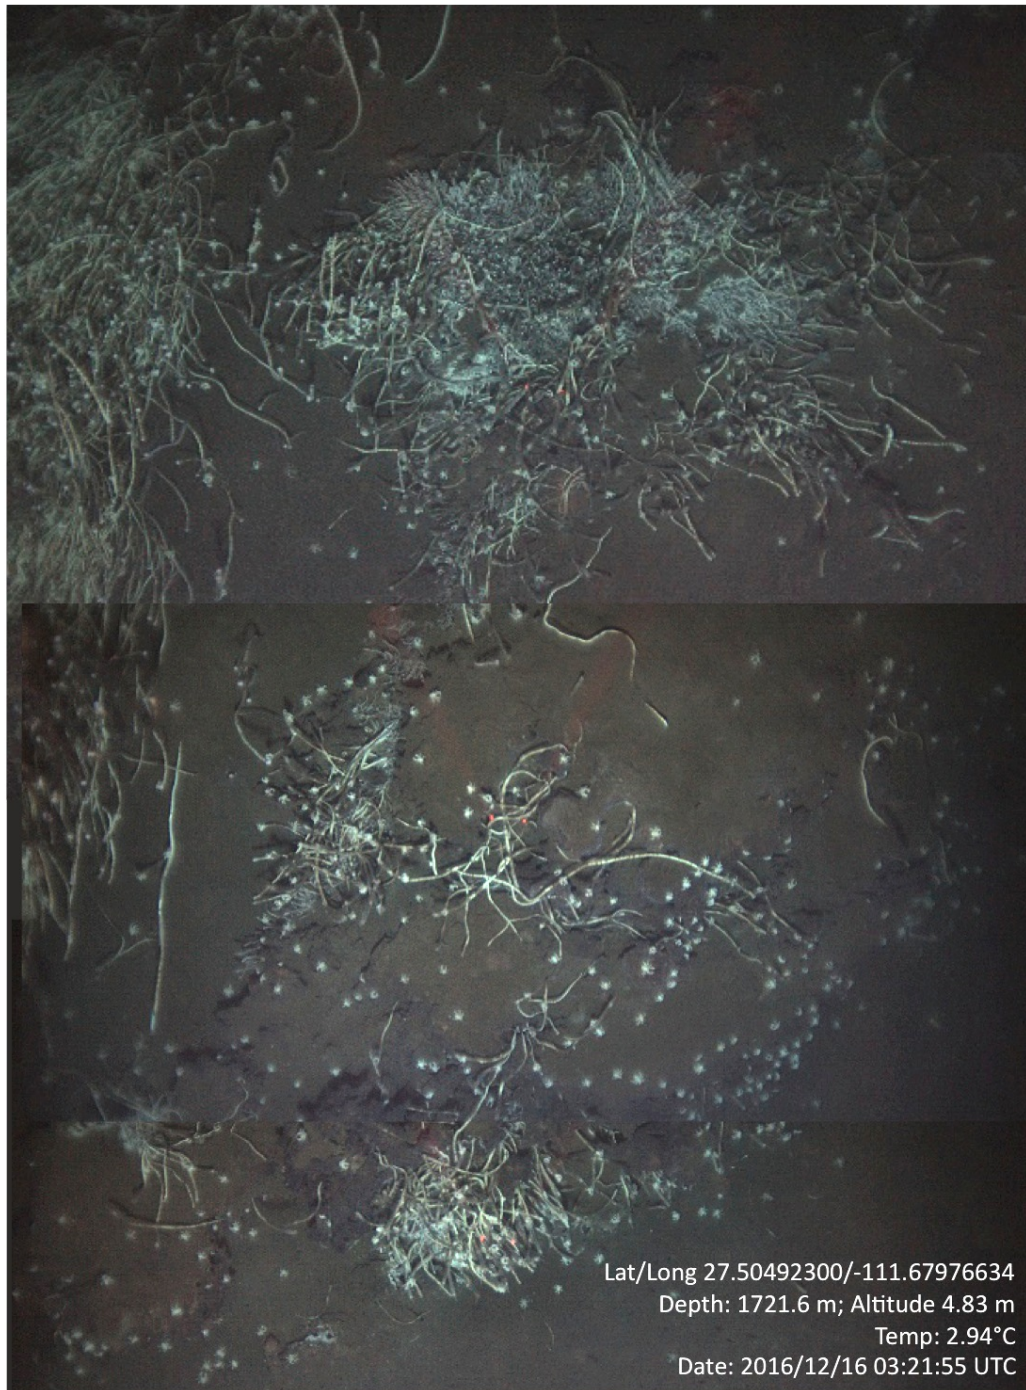

**Supplementary Figure 4B.** Photomosaic of tubeworms and small crabs associated with cracks in rocky surface, from *Sentry* dive 411 on the western ridge of Ringvent, performed at night between *Alvin* dives 4864 and 4865. Three adjacent overlapping photos were fitted together for this panel.



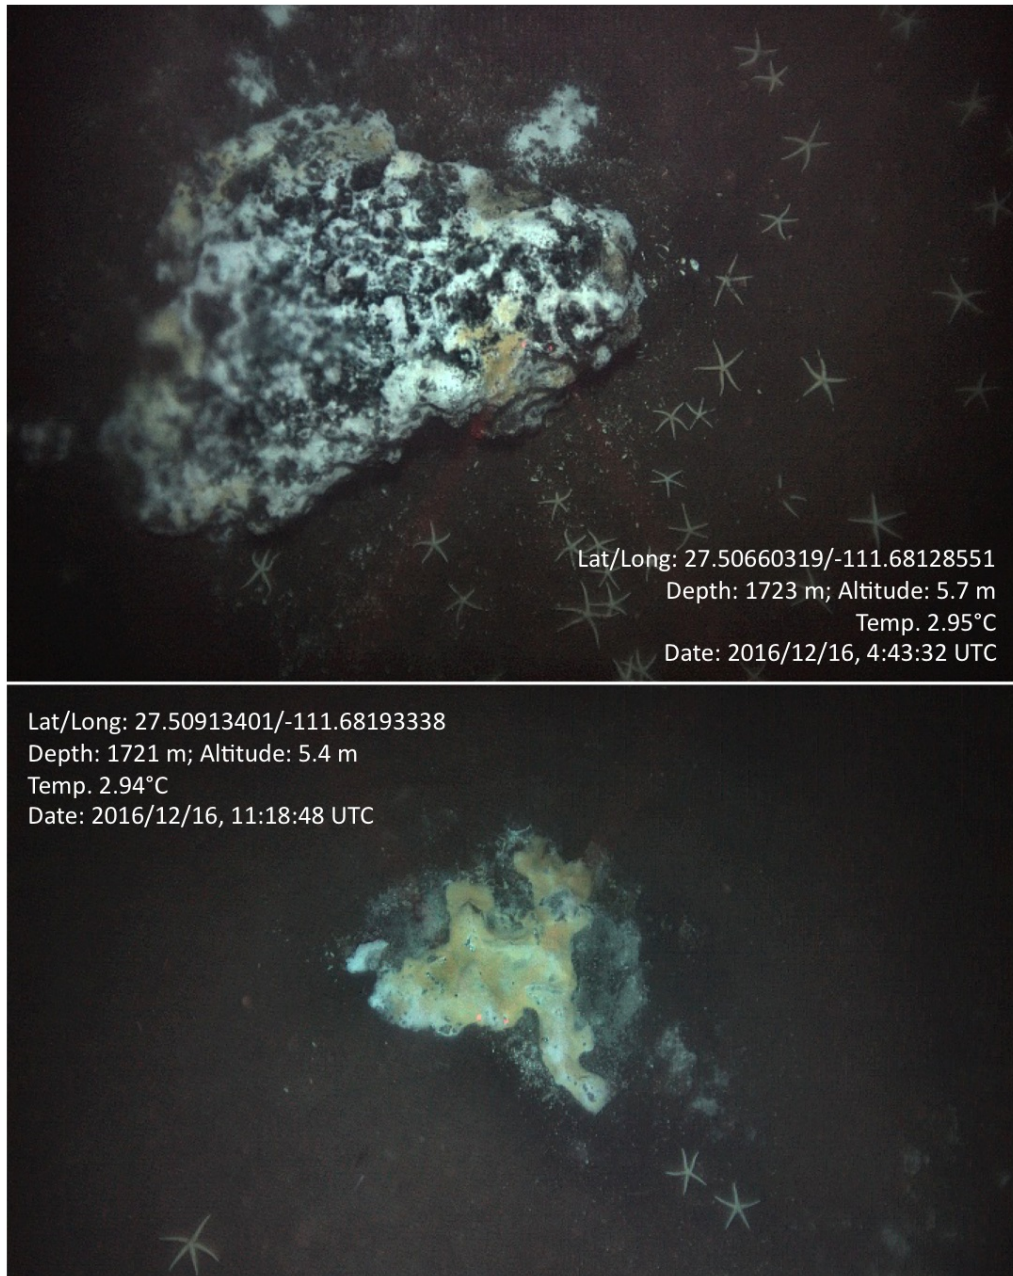

**Supplementary Figure 4C.** Photos of mat-covered rocky outcrop (top) and sediment (bottom), from *Sentry* dive 411 on the western ridge of Ringvent, performed at night between *Alvin* dives 4864 and 4865. The sediment mat was thermally profiled during *Alvin* dive 4865, showing *in-situ* temperatures near 70°C beginning at ca. 30 cm depth (Temperature profile H5 in Data Table 1).



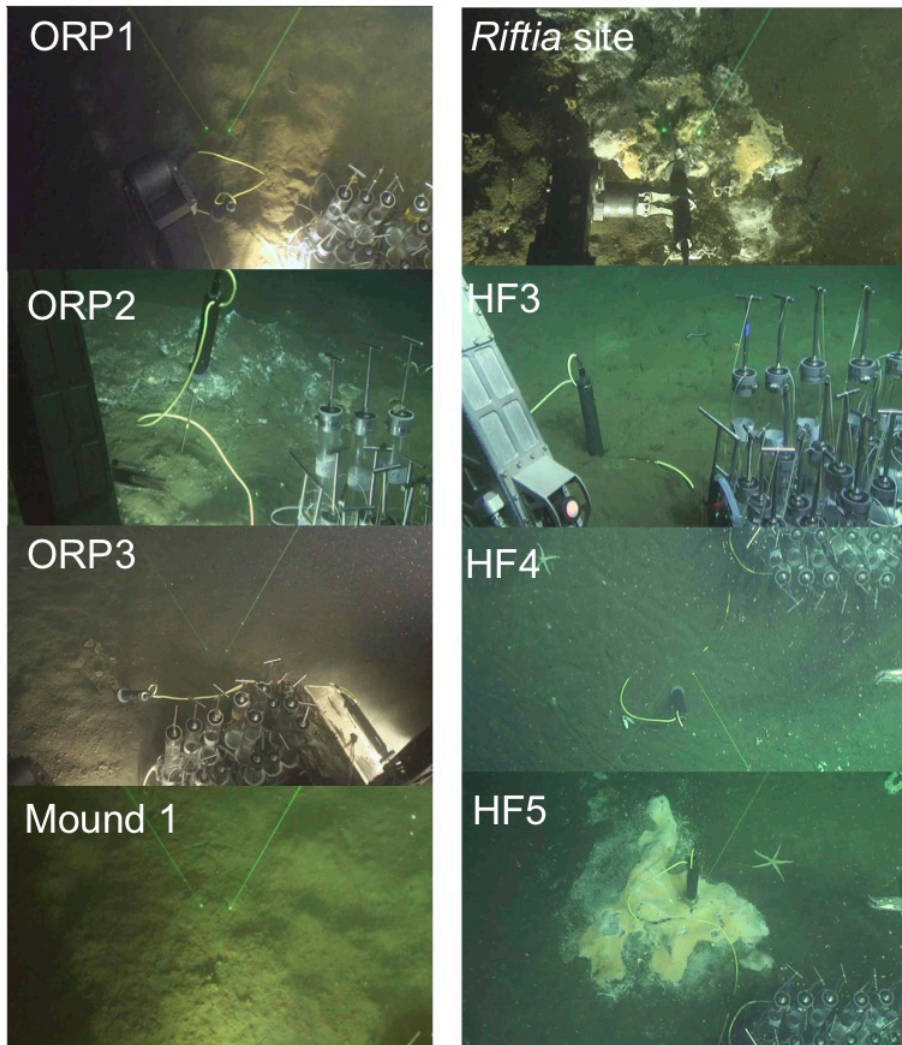

**Supplementary Figure 5.** In-situ photos and detailed context of heatflow measurements. Thermal readings were taken after equilibration of 5-10 minutes. At ORP 1, the sediment wobbled jello-like with every movement of *Alvin's* heatflow probe and cores, and contained ampheterid polychaetes. At ORP 2, silicate deposits blocked the full insertion of the probe into sediment. *Alvin* backed up ca. 5 meters, until the probe could be fully inserted into soft sediment (ORP3). The Mound 1 profile was measured in a sedimented area with polychaete tubes. At the *Riftia* site near ORP, the probe could not be fully inserted into the brittle underlying mineral substrate, and the top temperature sensor was located ca. 5 cm above the seawater interface. The near-identical profiles HF1 to 3 (Dive 4865) were measured in seafloor sediment on the western periphery of Ringvent; HF4 was obtained in a clam field near a small valley leading into the mound, and HF5 was measured in white-orange *Beggiatoa* mat within this cleft during dive 4865 (Supplementary Figure 4C).

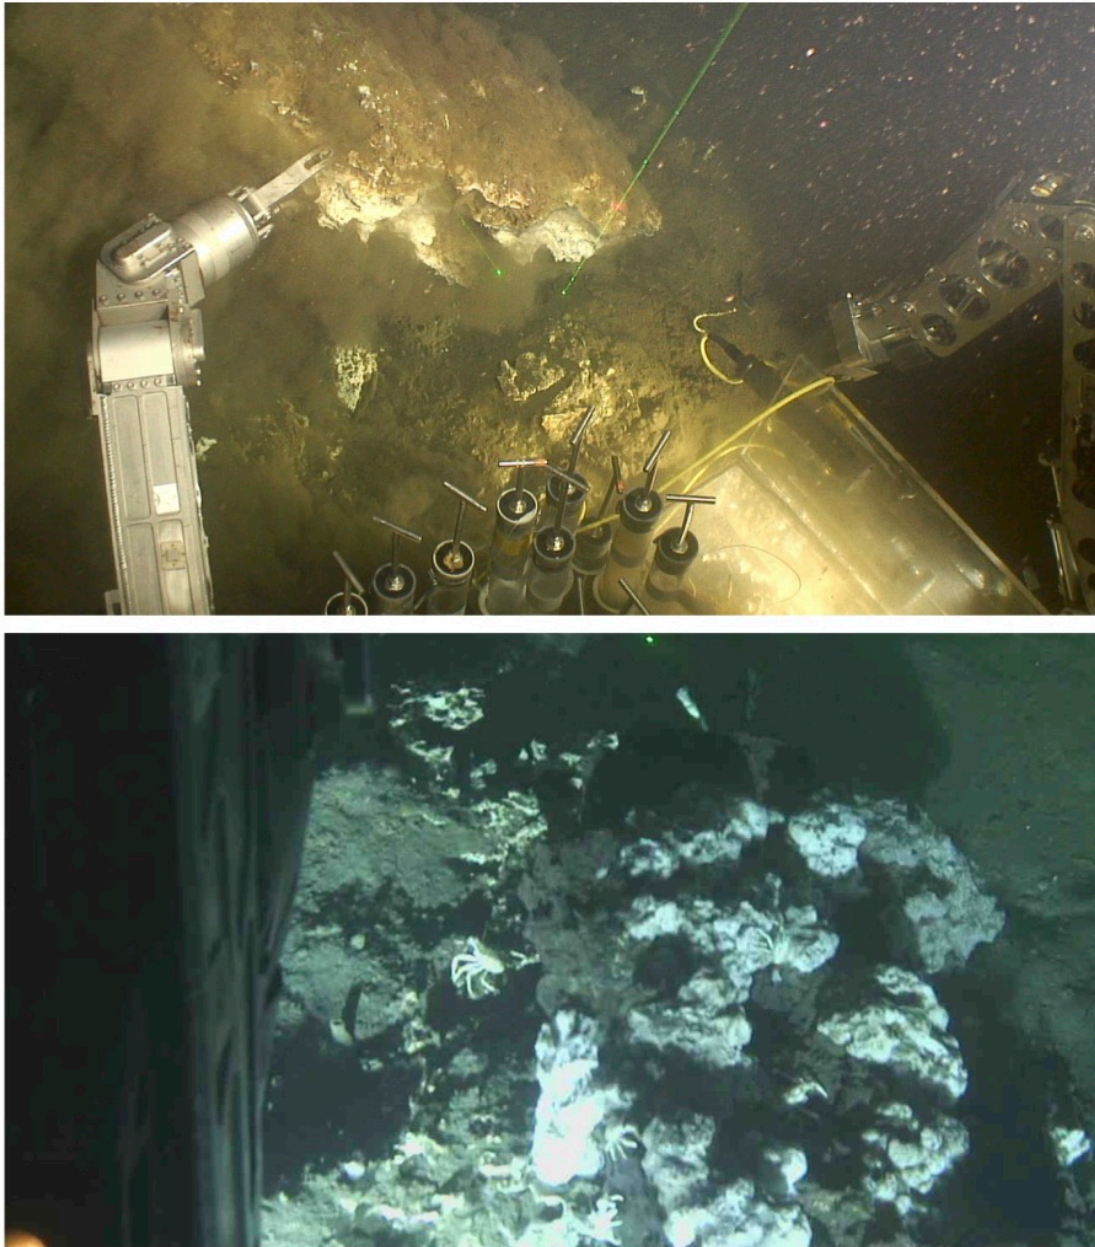

**Supplementary Figure 6.** Sampling sites for mineral specimens shown in Figure 3. Top, *Alvin* is sampling a large, lightly sediment-covered silicate without visible epifauna at ORP site, Dive 4864. Bottom, pre-sampling view of a conspicuous, craggy outcrop yielding silicates with aragonite veins, with sponge-like white and grey overgrowth and galatheid crabs, rising ca 0.5 m above the surrounding sediment at Mound 1 site, Dive 4864.

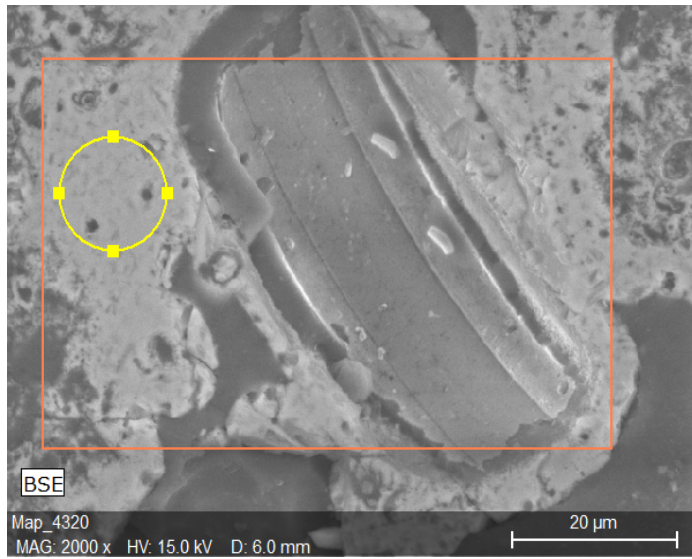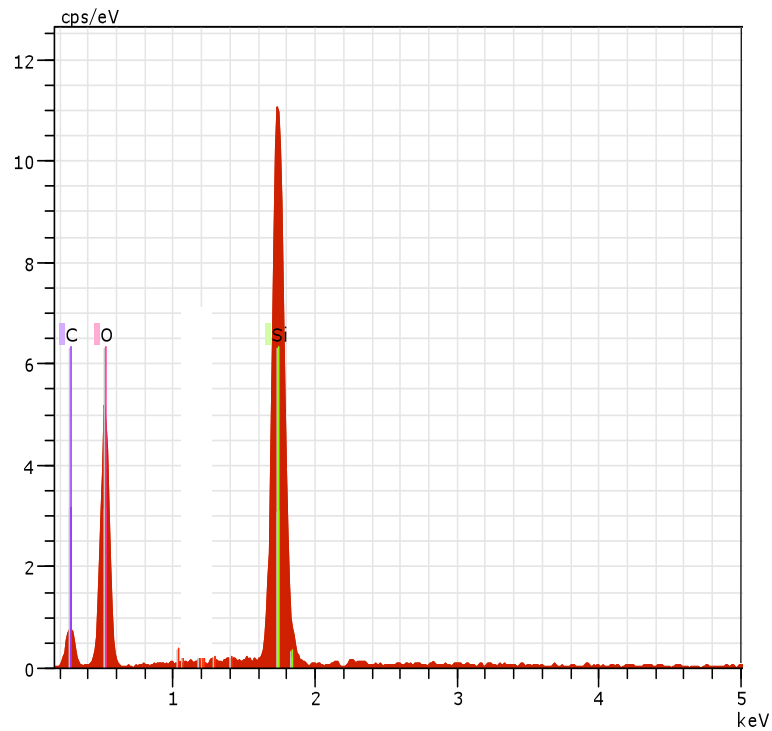

**Supplementary Figure 7.** Scanning electron microscopy and energy-dispersive X-ray Spectroscopy (SEM-EDS) of seafloor silicate samples from Ringvent, collected at the ORP site during *Alvin* dive 4864. Top, SEM microphotograph of thin section surface, with centric diatom embedded in the silica matrix. Bottom, EDS spectrum of the mineral surface in the area marked by the yellow circle, with dominant Si peak and smaller C and O peaks.



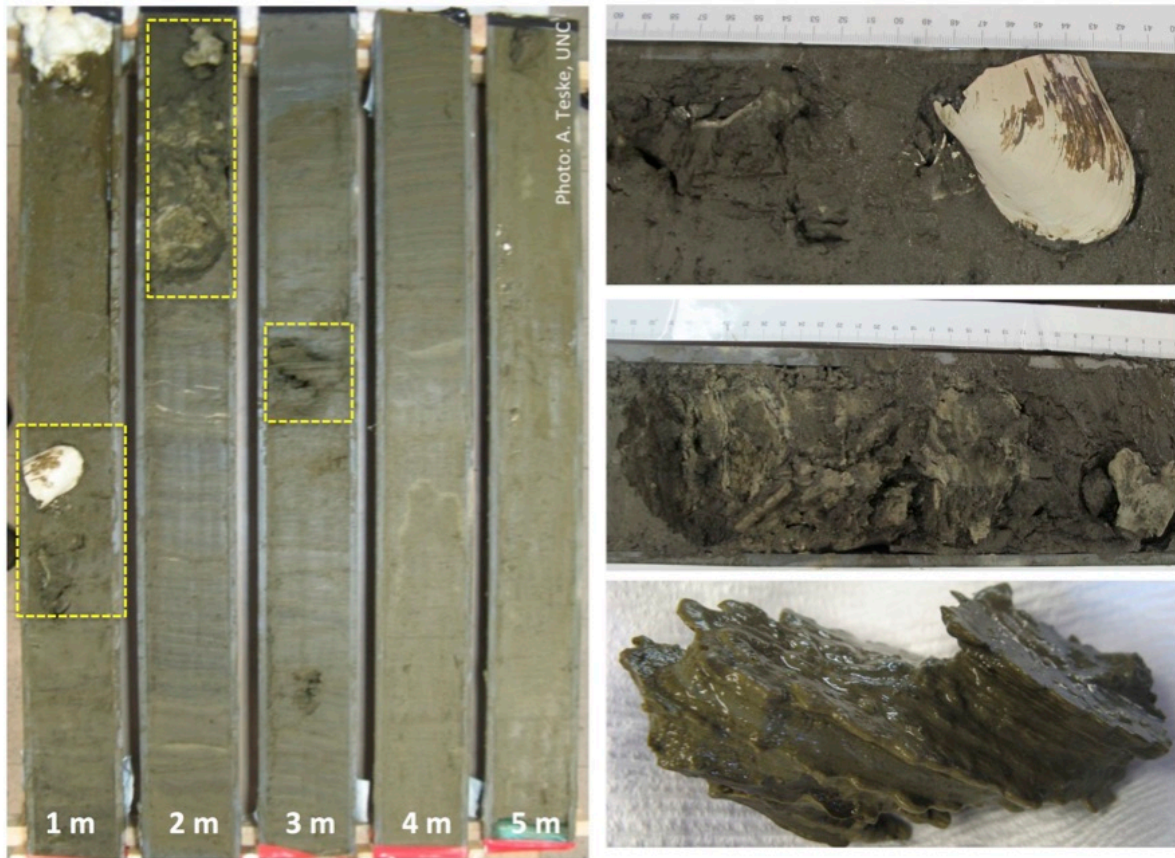

**Supplementary Figure 8. Piston core from the central Ringvent area.** Core P11 was collected during the RV *El Puma* survey in October 2014 at 27°N30'5090/111°W40'6860 in the central bowl of Ringvent. The core penetrated nearly 5 m into the ochre-brown diatom-ooze sediment (left panel), and recovered a seep clam (probably *Archivesica gigas*) at ca. 0.5 mbsf (top right), carbonate nodules that started at ca. 0.5 m depth and were most abundant at 1.0 to 1.25 mbsf (middle right), and hydrothermally altered and recrystallized silica, including a conspicuous silica nodule at 2.35 mbsf (bottom right).

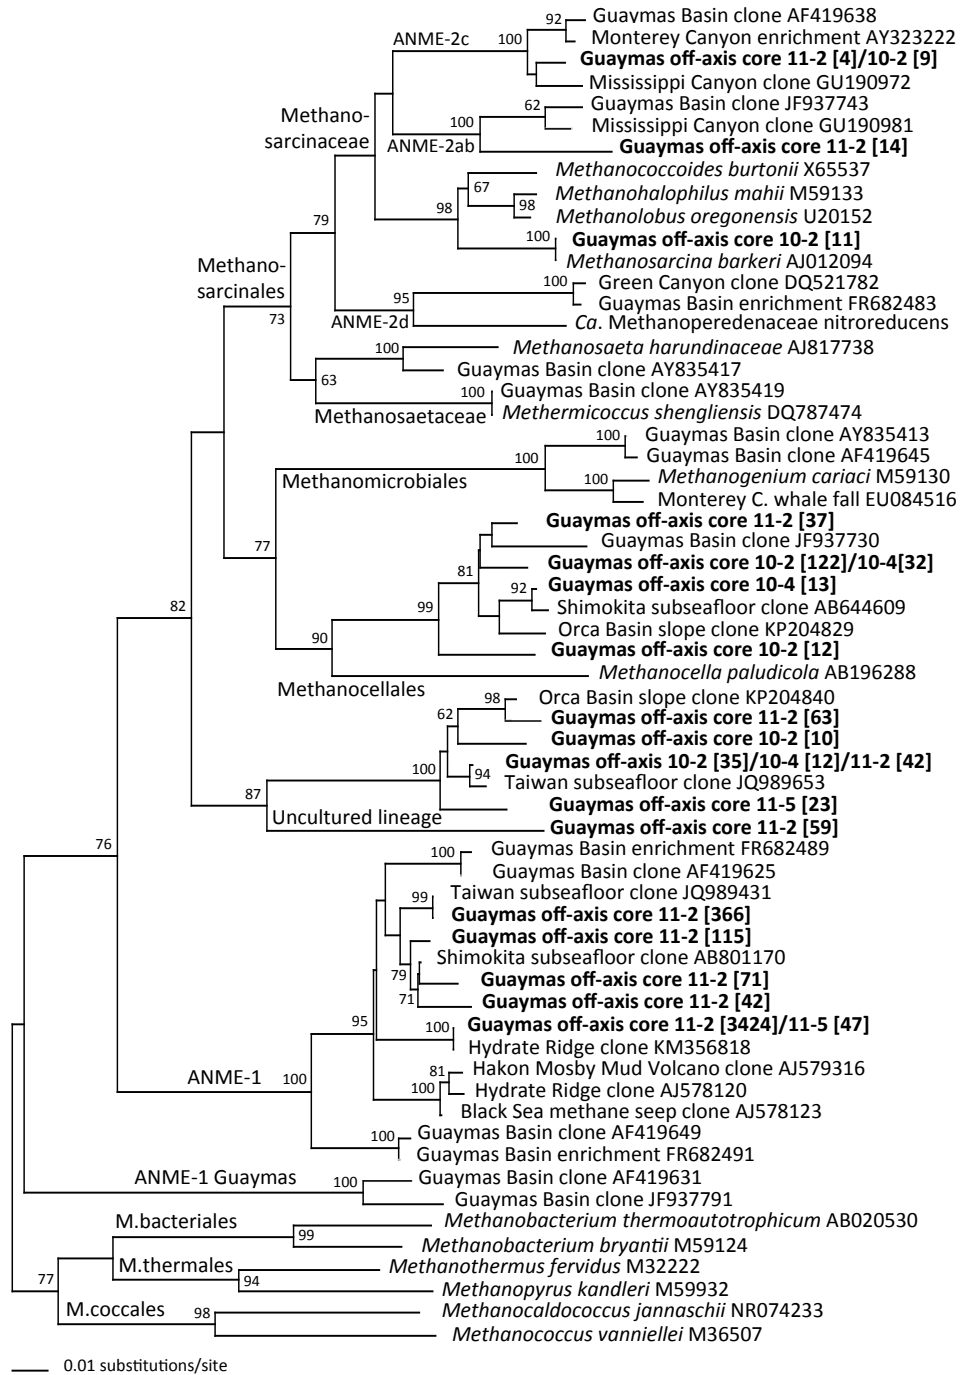

**Supplementary Figure 9.** Distance tree of representative archaeal partial 16S rRNA gene sequences (*E. coli* positions 517–958) from the Guaymas Basin v4/v5 amplicon dataset, annotated with the number of sequences within each OTU [in brackets] separately for each sample in cores P10 and P11.

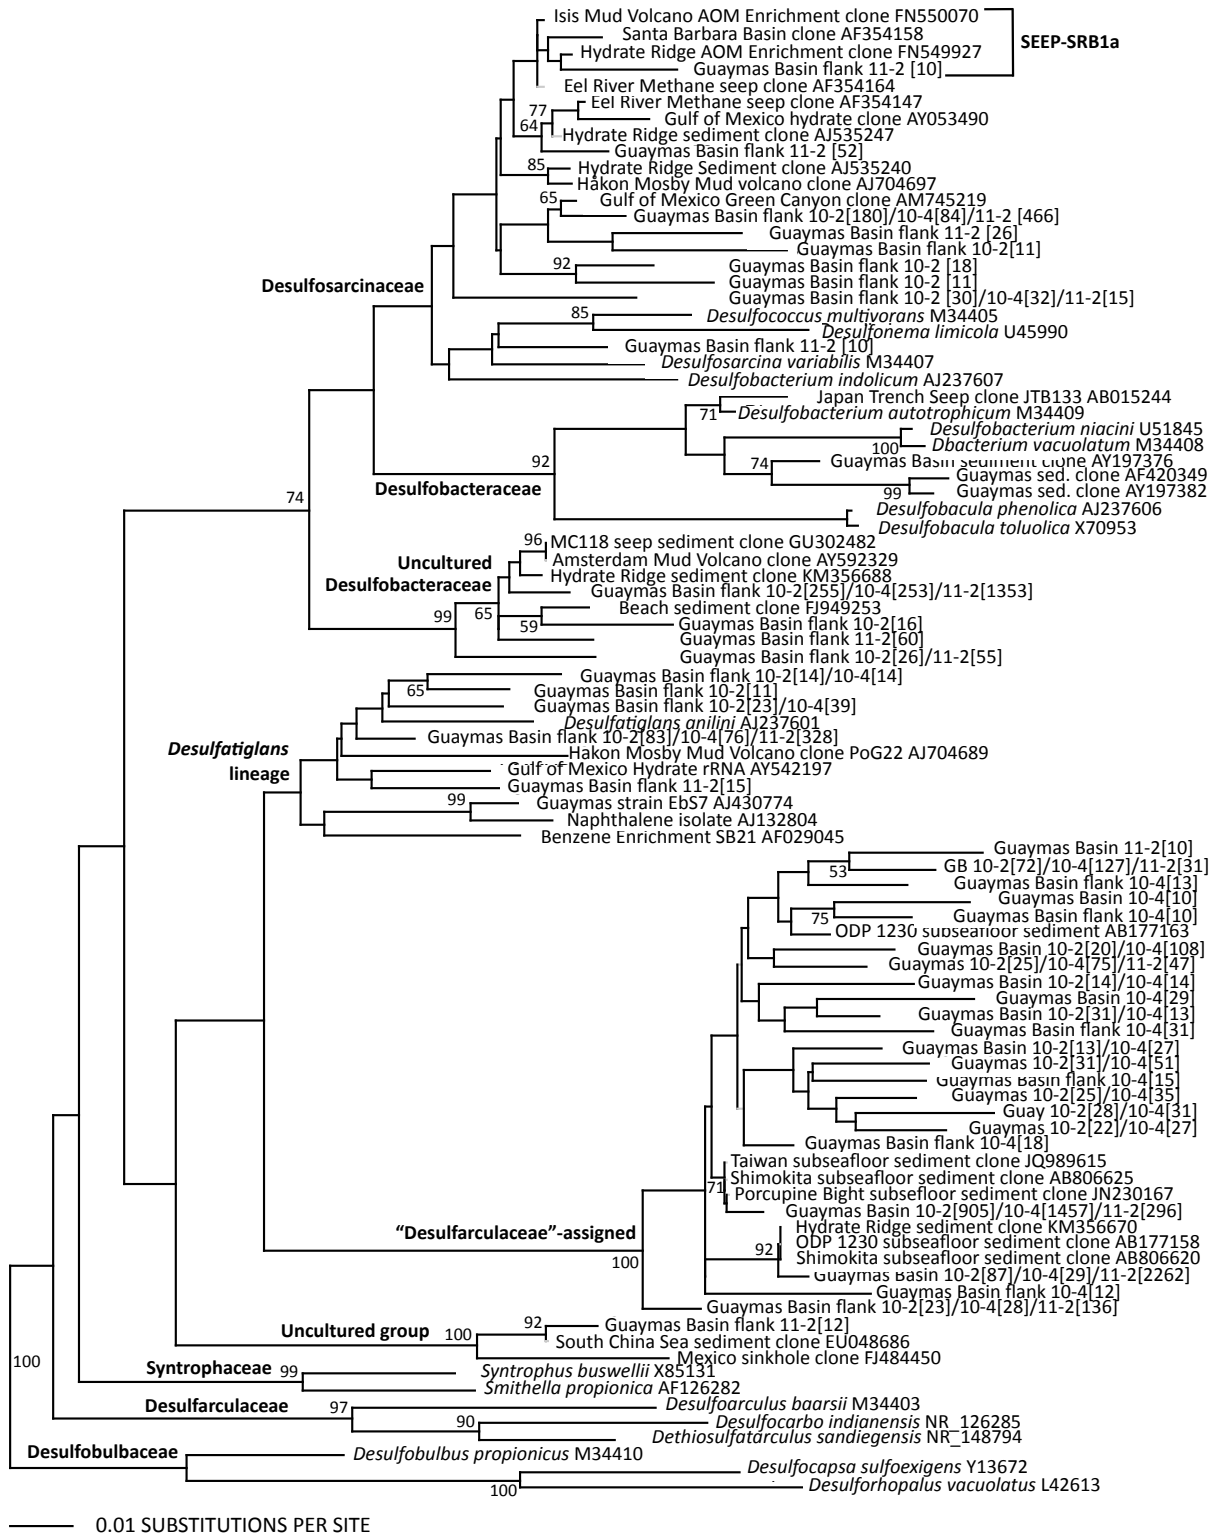

**Supplementary Figure 10.** Distance tree of representative deltaproteobacterial partial 16S rRNA gene sequences (*E. coli* positions 517–958) from the Guaymas Basin v4/v5 amplicon dataset, annotated with the number of sequences within each OTU [in brackets] separately for each sample in cores P10 and P11.



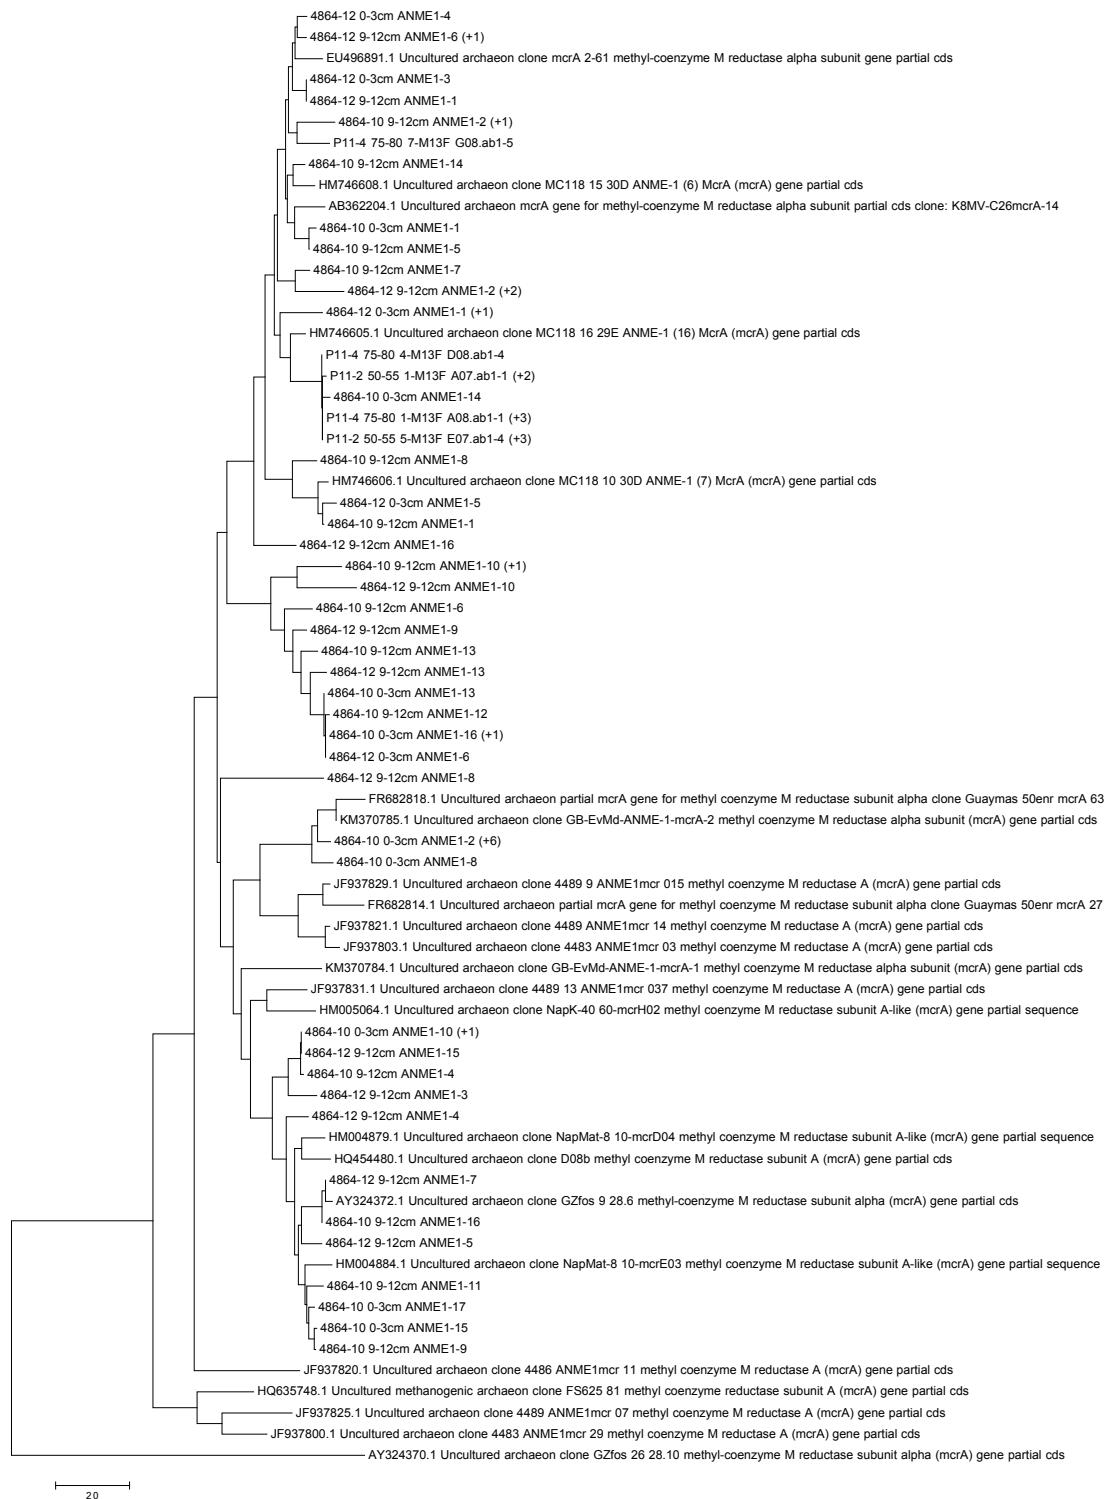

**Supplementary Figure 11.** Distance tree of the methyl-coenzyme M reductase alpha subunit gene, inferred with MEGA. The Ringvent sequences start with dive code 4864, followed by core number 10 or 12, and cm layer below surface. Multiple near-identical sequences representing the same phylogenetic branch are indicated in parentheses.

## Supplemental Tables

**Supplementary Data 1.** Porewater sulfide concentrations in Ringvent sediments, measured in *Alvin* pushcores sampled during *Alvin* dive 4864 at the Mound 1 site (Supplementary Figure 2).

| Sediment depth | 4861-10           | 4864-12           |
|----------------|-------------------|-------------------|
| 0-3 cm         | 267 $\mu\text{M}$ | 8 $\mu\text{M}$   |
| 3-6 cm         | No data           | no data           |
| 6-9 cm         | 955 $\mu\text{M}$ | No data           |
| 9-12 cm        | No data           | No data           |
| 12-15 cm       | 796 $\mu\text{M}$ | 285 $\mu\text{M}$ |
| 15-18 cm       | 625 $\mu\text{M}$ | No data           |

**Supplementary Data 2. XRD analysis of mineral concretions from core P11,**  
performed with Rigaku Smart Lab XRD using 0.003° resolution, 1°/minute using a ICDD  
PDF4+ 2019 database (Ivano Aiello, Moss Landing Marine Labs).

| Sample         | Sediment depth in cm | Sample type                                              | Composition                                                                                       |
|----------------|----------------------|----------------------------------------------------------|---------------------------------------------------------------------------------------------------|
| P11_1_42-48    | 42-48                | Clam shell                                               | 100% aragonite                                                                                    |
| P11_1_54-60 cm | 54-60                | Carbonate concretion                                     | ~98% magnesian calcite, ~2% quartz                                                                |
| P11_2_4-9 cm   | 94-99                | Carbonate concretion                                     | ~77% magnesian calcite, ~8% halite, ~2% pyrite, ~6% quartz, ~3% calcite; ~4% unknown              |
| P11_2_12-15 cm | 102-105              | Carbonate concretion                                     | ~77% magnesian calcite, ~8% halite, ~2% pyrite, ~6% quartz, ~3% calcite; ~4% unknown              |
| P11_2_24-31 cm | 114-121              | Carbonate concretion                                     | ~77% magnesian calcite, ~8% halite, ~2% pyrite, ~6% quartz, ~3% calcite; ~4% unknown              |
| P11_3_10-11 cm | 200-201              | Ash                                                      | ~50%quartz, ~27% orthoclase, ~17% muscovite, ~4%pyrite, ~2% anorthite                             |
| P11_3_38-39 cm | 228-229              | Ash                                                      | ~36%albite, ~30%halite, ~25%quartz, ~5%pyrite; includes opal-A                                    |
| P11_3_40-45 cm | 230-235              | Large 'laminated' silica concretion with microbial beads | Mainly opal-A with ~8% halite, 6% quartz                                                          |
| P11_3_78-79    | 268-269              | Ash                                                      | ~24% albite, ~22% halite, ~22% gaylussite, ~17% quartz, ~12% calcite, ~5% pyrite; includes opal-A |



**Supplementary Data 3. Isotopic data for carbonate nodules and sedimentary carbonates.** Data are listed by sample identification in the left column [core No., section number, cm within section, sample type], followed by total sediment depth in cm, sample type, and  $\delta^{13}\text{C}$  and  $\delta^{18}\text{O}$  isotopic composition relative to VPDB, with standard deviations. Surficial minerals with fibrous aragonite veins, and the clam shell collected at the Mound 1 site of Ringvent are listed after the piston core samples. Sediments immediately adjacent to and surrounding a nodule are contrasted to sediments without direct association to nodules, matching the color and symbol code in Figure 4.

| Core_section_cm | cm in core | sample type                 | $\delta^{13}\text{C}$ [‰] | $\pm 1$ s.d. | $\delta^{18}\text{O}$ [‰] | $\pm 1$ s.d. |
|-----------------|------------|-----------------------------|---------------------------|--------------|---------------------------|--------------|
| P11_1_28-29     | 28.5       | bulk sediment               | 0.24                      | 0.04         | -0.40                     | 0.06         |
| P11_1_42-48     | 45         | Clam shell                  | 0.52                      | 0.02         | 3.71                      | 0.05         |
| P11_1_54-60     | 57         | Non-skeletal nodule         | -33.97                    | 0.03         | 4.24                      | 0.06         |
| P11_1_54-60     | 57         | sediment adjacent to nodule | -14.83                    | 0.02         | 1.72                      | 0.03         |
| P11_1_73-74     | 73.5       | bulk sediment               | -2.89                     | 0.03         | 0.15                      | 0.05         |
| P11_1_78-79     | 78.5       | bulk sediment               | -8.48                     | 0.04         | 0.49                      | 0.08         |
| P11_1_83-86     | 84.5       | Non-skeletal nodule         | -37.99                    | 0.03         | 3.64                      | 0.02         |
| P11_1_83-86     | 84.5       | sediment adjacent to nodule | -30.5                     | 0.02         | 2.62                      | 0.04         |
| P11_2_03-04     | 93.5       | bulk sediment               | -9.67                     | 0.06         | 0.38                      | 0.07         |
| P11_2_04-09     | 96.5       | Non-skeletal nodule         | -38.34                    | 0.02         | 3.61                      | 0.04         |
| P11_2_12-15     | 103.5      | Non-skeletal nodule         | -39.54                    | 0.03         | 3.65                      | 0.02         |
| P11_2_12-15     | 103.5      | sediment adjacent to nodule | -30.9                     | 0.01         | 2.75                      | 0.04         |
| P11_2_15-18     | 106.5      | Non-skeletal nodule         | -36.81                    | 0.04         | 3.81                      | 0.06         |
| P11_2_15-18     | 106.5      | sediment adjacent to nodule | -33.38                    | 0.01         | 2.97                      | 0.02         |
| P11_2_18-21     | 109.5      | Non-skeletal nodule         | -37.14                    | 0.03         | 3.68                      | 0.01         |
| P11_2_18-21     | 109.5      | sediment adjacent to nodule | -36.5                     | 0.02         | 3.25                      | 0.04         |
| P11_2_21-24     | 112.5      | bulk sediment               | -39.81                    | 0.04         | 3.78                      | 0.03         |
| P11_2_24-31     | 117.5      | Non-skeletal nodule         | -39.96                    | 0.02         | 3.80                      | 0.03         |

|             |       |               |       |      |       |      |
|-------------|-------|---------------|-------|------|-------|------|
| P11_2_34-35 | 124.5 | bulk sediment | -3.23 | 0.03 | 0.19  | 0.06 |
| P11_3_53-54 | 243.5 | bulk sediment | -0.73 | 0.02 | -0.09 | 0.08 |

|             |       |               |      |      |       |      |
|-------------|-------|---------------|------|------|-------|------|
| P10_1_01-02 | 1.5   | bulk sediment | n.d. | n.d. | n.d.  | n.d. |
| P10_1_26-27 | 26.5  | bulk sediment | n.d. | n.d. | n.d.  | n.d. |
| P10_1_51-52 | 51.5  | bulk sediment | 0.25 | 0.03 | -0.65 | 0.06 |
| P10_1_77-78 | 77.5  | bulk sediment | n.d. | n.d. | n.d.  | n.d. |
| P10_2_01-02 | 100.5 | bulk sediment | 0.51 | 0.03 | -0.25 | 0.07 |
| P10_2_26-27 | 125.5 | bulk sediment | n.d. | n.d. | n.d.  | n.d. |
| P10_2_51-52 | 150.5 | bulk sediment | 0.15 | 0.03 | -0.03 | 0.07 |
| P10_2_77-78 | 176.5 | bulk sediment | n.d. | n.d. | n.d.  | n.d. |
| P10_3_01-02 | 200.5 | bulk sediment | 0.28 | 0.03 | -0.24 | 0.04 |
| P10_3_26-27 | 225.5 | bulk sediment | 0.1  | 0.03 | 0.45  | 0.03 |
| P10_3_51-52 | 250.5 | bulk sediment | 0.04 | 0.04 | -0.45 | 0.07 |
| P10_3_77-78 | 276.5 | bulk sediment | n.d. | n.d. | n.d.  | n.d. |
| P10_4_01-02 | 299.5 | bulk sediment | 0.12 | 0.02 | -0.32 | 0.06 |
| P10_4_26-27 | 324.5 | bulk sediment | 0.25 | 0.02 | -0.12 | 0.05 |
| P10_4_51-52 | 349.5 | bulk sediment | n.d. | n.d. | n.d.  | n.d. |
| P10_4_77-78 | 375.5 | bulk sediment | 0.37 | 0.03 | -0.07 | 0.08 |

|             |      |               |       |      |       |      |
|-------------|------|---------------|-------|------|-------|------|
| P05_1_00-05 | 2.5  | bulk sediment | -0.66 | 0.05 | -1.07 | 0.07 |
| P05_1_25-30 | 27.5 | bulk sediment | n.d.  | n.d. | n.d.  | n.d. |
| P06_1_50-55 | 52.5 | bulk sediment | -1.26 | 0.04 | -0.32 | 0.07 |
| P06_2_00-05 | 103  | bulk sediment | n.d.  | n.d. | n.d.  | n.d. |
| P06_3_00-05 | 203  | bulk sediment | -1.12 | 0.03 | 0.05  | 0.05 |
| P06_3_50-55 | 253  | bulk sediment | -0.64 | 0.10 | -0.01 | 0.05 |
| P06_3_75-80 | 278  | bulk sediment | -1.18 | 0.01 | 0.66  | 0.02 |
| P06_4_00-05 | 303  | bulk sediment | n.d.  | n.d. | n.d.  | n.d. |
| P06_4_25-30 | 328  | bulk sediment | -1.17 | 0.03 | 0.43  | 0.04 |
| P06_4_50-55 | 353  | bulk sediment | -1.03 | 0.03 | 0.00  | 0.08 |

|             |     |               |      |      |      |      |
|-------------|-----|---------------|------|------|------|------|
| P12_1_34-36 | 35  | bulk sediment | 9.52 | 2.56 | 0.99 | 0.06 |
| P12_2_85-86 | 185 | bulk sediment | 7.44 | 2.42 | 1.46 | 0.18 |

|                  |  |                   |       |      |     |      |
|------------------|--|-------------------|-------|------|-----|------|
| Mound 1, surface |  | Fibrous Aragonite | -45.1 | n.a. | 3.2 | n.a. |
| Mound 1, surface |  | Fibrous Aragonite | -47.2 | n.a. | 4.1 | n.a. |
| Mound 1, surface |  | Clam shell        | 1.1   | n.a. | 3.4 | n.a. |

**Supplementary Data 4. Radiocarbon [<sup>14</sup>C] ages and sedimentation rates for Guaymas Basin and Sonora Margin sediments.** Sedimentation rates were not inferred from cores P5 and P6 due to distortions by slumping. Measurements were made on bulk sediment without authigenic carbonate phases, and thus the majority of carbon in the samples is organic carbon produced by primary producers. Sedimentation Rates are based on using the youngest and oldest samples to obtain an average for the dated part of the core.

| Core | Depth in core [cm] | <sup>14</sup> C age [ybp] | Calendar age [ybp] | Sed. Rate [mm/year] |
|------|--------------------|---------------------------|--------------------|---------------------|
| P03  | 274                | 6895 ± 35                 | 6999               | 0.39                |
| P10  | 1.5                | 1375 ± 30                 | 567                | 0.56                |
|      | 350                | 6730 ± 35                 | 6791               |                     |
| P11  | 3.5                | 1595 ± 25                 | 758.5              | 0.2286              |
|      | 47.5               | 3690 ± 35                 | 3289               |                     |
|      | 73.5               | 7075 ± 30                 | 7183               |                     |
|      | 244                | 10635 ± 40                | 11258              |                     |
| P12  | 5.5                | 2200 ± 35                 | 1367               | 0.97                |
|      | 35                 | 2500 ± 30                 | 1673               |                     |
|      | 150                | 3585 ± 30                 | 2986               |                     |
|      | 185                | 3875 ± 30                 | 3339               |                     |
|      | 274                | 4330 ± 30                 | 3905               |                     |
|      | 321                | 4665 ± 30                 | 4351               |                     |
|      | 361                | 4650 ± 35                 | 4335               |                     |
| P13  | 3.5                | 1620 ± 30                 | 775                | 0.99                |
|      | 30                 | 5405 ± 30*                | 5371*              |                     |
|      | 93                 | 2680 ± 35                 | 227                |                     |
|      | 156                | 3170 ± 30                 | 400                |                     |
|      | 226                | 3400 ± 30                 | 693                |                     |
|      | 311                | 4315 ± 30                 | 1769               |                     |

\* outlier



**Supplementary Data 5. Concentration and isotopic data for gravity core porewater chemistry.** Data for each core are listed [from left to right] by sample number, actual sediment depth in cm, concentration in millimolar,  $\delta^{13}\text{C}$  isotopic composition in per mil, and standard deviations of isotopic composition when available for multiple measurements. A depth of -2 cm indicates supernatant samples, collected from the top of freshly recovered piston cores.

**A) Porewater methane**

| <b>CORE P6</b> | cm  | mM    | $\delta^{13}\text{C}$ [‰] | $\pm 1$ sd |
|----------------|-----|-------|---------------------------|------------|
| 1              | 2   | 0.09  | -79.85                    | No data    |
| 2              | 52  | 0.27  | -80.23                    | No data    |
| 3              | 102 | 0.81  | -85.4                     | No data    |
| 4              | 152 | 6.81  | -87.2                     | 0.041      |
| 5              | 202 | 4.72  | -86.91                    | 0.215      |
| 6              | 252 | 10.73 | -86.43                    | 0.082      |
| 7              | 302 | 10.68 | -86.2                     | 0.008      |
| 8              | 352 | 9.51  | -86.16                    | 0.157      |
| 9              | 392 | 7.75  | -86.42                    | 0.479      |

| <b>CORE P10</b> | cm  | mM     | $\delta^{13}\text{C}$ [‰] | $\pm 1$ sd |
|-----------------|-----|--------|---------------------------|------------|
| 1               | -2  | 0.006  | -63.87                    | No data    |
| 2               | 2   | 0.0077 | -64.77                    | No data    |
| 3               | 52  | 0.0091 | -68.12                    | No data    |
| 4               | 101 | 0.0103 | -68.24                    | No data    |
| 5               | 151 | 0.0077 | -70.79                    | No data    |
| 6               | 201 | 0.0051 | -68.5                     | No data    |
| 7               | 251 | 0.007  | -67.55                    | No data    |
| 8               | 300 | 0.0137 | -66.63                    | No data    |
| 9               | 350 | 0.0064 | -69.09                    | No data    |
| 10              | 392 | 0.006  | -67.66                    | No data    |

| <b>Core P11</b> | cm    | mM     | $\delta^{13}\text{C}$ [‰] | $\pm 1$ sd |
|-----------------|-------|--------|---------------------------|------------|
| 1               | 2     | 0.0107 | -66.12                    | No data    |
| 2               | 52    | 0.1809 | -62.62                    | No data    |
| 3               | 92    | 0.4873 | -62.39                    | No data    |
| 4               | 142   | 1.01   | -62.54                    | 0.501      |
| 5               | 192   | 1.7069 | -61.14                    | No data    |
| 6               | 242   | 1.41   | -60.91                    | 0.095      |
| 7               | 291.5 | 1.47   | -60.43                    | 0.052      |
| 8               | 341.5 | 1.24   | -59.96                    | 0.146      |

|    |       |      |        |       |
|----|-------|------|--------|-------|
| 9  | 390.5 | 1.24 | -60.06 | 0.351 |
| 10 | 440.5 | 1.37 | -59.9  | 0.204 |
| 11 | 478.5 | 1.34 | -60.47 | 0.474 |

| <b>Core P12</b> | cm    | mM   | $\delta^{13}\text{C}$ [‰] | $\pm 1$ sd |
|-----------------|-------|------|---------------------------|------------|
| 1               | -2    | 0    | n.a.                      | No data    |
| 2               | 2     | 0.05 | -75.79                    | No data    |
| 3               | 52    | 0.13 | -75.62                    | No data    |
| 4               | 101.5 | 0.15 | -77.78                    | No data    |
| 5               | 151.5 | 0.27 | -81.12                    | No data    |
| 6               | 200.5 | 0.99 | -88.81                    | 0.356      |
| 7               | 250.5 | 4.3  | -89.28                    | 0.008      |
| 8               | 300.5 | 6.35 | -88.11                    | 0.161      |
| 9               | 350.5 | 8.03 | -87.91                    | 0.383      |
| 10              | 392.5 | 8.09 | -87.97                    | 0.214      |

## B) Porewater DIC

| <b>CORE P6</b> | cm  | mM    | $\delta^{13}\text{C}$ [‰] | $\pm 1$ sd |
|----------------|-----|-------|---------------------------|------------|
| 1              | 5   | 14.87 | -14.54                    | 0.141      |
| 2              | 55  | 30.47 | -16.01                    | 0.201      |
| 3              | 105 | 37.96 | -16.37                    | 0.122      |
| 4              | 155 | 49.04 | -12.72                    | 0.165      |
| 5              | 205 | 44.12 | -11.29                    | 0.076      |
| 6              | 255 | 49.42 | -10.79                    | 0.001      |
| 7              | 305 | 43.87 | -11.03                    | 0.223      |
| 8              | 355 | 46.41 | -11.2                     | 0.112      |
| 9              | 395 | 41.66 | -10.98                    | 0.057      |

| <b>CORE P10</b> | cm  | mM   | $\delta^{13}\text{C}$ [‰] | $\pm 1$ sd |
|-----------------|-----|------|---------------------------|------------|
| 1               | 5   | 3.48 | -6.54                     | 0.274      |
| 2               | 55  | 4.17 | -8.37                     | 0.086      |
| 3               | 104 | 4.66 | -8.8                      | 0.146      |
| 4               | 154 | 4.23 | -9.29                     | 0.115      |
| 5               | 204 | 3.47 | -9.61                     | 0.053      |
| 6               | 254 | 4.86 | -9.74                     | 0.035      |
| 7               | 303 | 6.09 | -9.69                     | 0.107      |
| 8               | 353 | 2.95 | -10.67                    | 0.112      |
| 9               | 403 | 4.04 | -9.9                      | 0.045      |

| <b>Core P11</b> | cm | mM   | $\delta^{13}\text{C}$ [‰] | $\pm 1$ sd |
|-----------------|----|------|---------------------------|------------|
| 1               | -2 | 1.75 | -0.35                     | 0.385      |

|    |       |      |       |       |
|----|-------|------|-------|-------|
| 2  | 5     | 2.65 | -2.62 | 0.056 |
| 3  | 55    | 2.63 | -2.73 | 0.062 |
| 4  | 80    | 3.38 | -5.23 | 0.119 |
| 5  | 95    | 3.5  | -4.64 | 0.181 |
| 6  | 145   | 3    | -4.46 | 0.023 |
| 7  | 195   | 2.99 | -4.65 | 0.039 |
| 8  | 240   | 3.43 | -5.07 | 0.135 |
| 9  | 294.5 | 3.71 | -5.65 | 0.037 |
| 10 | 344.5 | 4.38 | -8.12 | 0.395 |
| 11 | 443.5 | 4.14 | -8.6  | 0.184 |
| 12 | 468.5 | 3.9  | -8.46 | 0.048 |

| <b>Core P12</b> | cm    | mM    | $\delta^{13}\text{C}$ [‰] | $\pm 1$ sd |
|-----------------|-------|-------|---------------------------|------------|
| 1               | -2    | 1.41  | -2.89                     | 0.22       |
| 2               | 5     | 11.09 | -15.38                    | 0.238      |
| 3               | 55    | 23.22 | -18.09                    | 0.043      |
| 4               | 104.5 | 18.65 | -17.81                    | 0.005      |
| 5               | 154.5 | 31.92 | -19.12                    | 0.012      |
| 6               | 203.5 | 32.53 | -18.7                     | 0.020      |
| 7               | 253.5 | 32.98 | -16.96                    | 0.093      |
| 8               | 303.5 | 17.26 | -13.64                    | 0.042      |
| 9               | 353.5 | 25.44 | -13.66                    | 0.019      |
| 10              | 404.5 | 19.63 | -15.24                    | 0.037      |

### C) Sulfate

Data for each core are listed [from left to right] by core segment, actual sediment depth in cm, concentration in millimolar as determined by ion chromatography, concentration in millimolar as determined by gravimetry, and  $\delta^{34}\text{S}$  isotopic composition of barium-precipitated sulfate in per mil relative to VCDT.  $\delta^{34}\text{S}$  data in red are based on very small sulfate amounts.

| <b>Core P6</b> | cm      | mM      | mM    | $\delta^{34}\text{S-SO}_4^{2-}$ |
|----------------|---------|---------|-------|---------------------------------|
| 1 0 5          | 0-5     | 19.52   | 17.99 | 39.5                            |
| 1 25 30        | 25-30   | 12.37   | 11.69 | 54.7                            |
| 1 50 55        | 50-55   | 7.33    | 8.43  | 65.5                            |
| 1 75 80        | 75-80   | No data | 4.77  | 76.0                            |
| 2 0 5          | 100-105 | 1.94    | 1.54  | 77.5                            |
| 2 25 30        | 125-130 | No data | 0.07  | 35.9                            |

|              |         |         |         |         |
|--------------|---------|---------|---------|---------|
| 2 50 55      | 175-180 | No data | 0.04    | 23.6    |
| 2 75 80      | 200-205 | 0.06    | 0.06    | 37.6    |
| 3 0 5        | 250-255 | 0.51    | No data | No data |
| 3 25 30      | 275-280 | 0.52    | 0.04    | 21.2    |
| 3 50 55      | 300-305 | 0.48    | No data | No data |
| 3 75 80      | 325-330 | 0.19    | 0.03    | 27.6    |
| 4 0 5        | 350-355 | 0.59    | 0.04    | 28.4    |
| 4 25 30      | 375-380 | 0.19    | No data | No data |
| Core catcher | 401     | No data | 0.06    | 25.9    |

| Core P10     | cm      | mM    | mM    | $\delta^{34}\text{S-SO}_4^{2-}$ |
|--------------|---------|-------|-------|---------------------------------|
| supernatant  | 0       | 29.20 | 25.88 | 21.2                            |
| 1 0 5        | 0-5     | 28.03 | 26.24 | 23.2                            |
| 1 25 30      | 25-30   | 27.66 | 26.13 | 24.3                            |
| 1 50 55      | 50-55   | 27.66 | 24.52 | 24.6                            |
| 1 75 80      | 75-80   | 27.45 | 25.68 | 24.8                            |
| 2 0 5        | 99-104  | 27.36 | 25.17 | 24.9                            |
| 2 25 30      | 124-129 | 27.24 | 24.87 | 24.9                            |
| 2 50 55      | 149-154 | 27.25 | 25.71 | 25.1                            |
| 2 75 80      | 174-179 | 27.31 | 26.96 | 25.1                            |
| 3 0 5        | 199-204 | 27.36 | 22.64 | 25.1                            |
| 3 25 30      | 224-229 | 28.01 | 25.85 | 25.3                            |
| 3 50 55      | 249-254 | 27.42 | 26.54 | 25.2                            |
| 3 75 80      | 274-279 | 27.39 | 24.77 | 25.3                            |
| 4 0 5        | 298-303 | 27.40 | 25.52 | 25.2                            |
| 4 25 30      | 323-328 | 27.40 | 25.57 | 25.4                            |
| 4 50 55      | 348-353 | 27.23 | 26.49 | 25.4                            |
| 4 75 80      | 373-378 | 27.82 | 25.51 | 25.4                            |
| Core catcher | 393-403 | 27.43 | 26.23 | 25.4                            |

| Core P11    | cm      | mM      | mM    | $\delta^{34}\text{S-SO}_4^{2-}$ |
|-------------|---------|---------|-------|---------------------------------|
| supernatant | 0       | 29.56   | 24.86 | 21.3                            |
| 1 0 5       | 0-5     | 28.90   | 27.10 | 21.5                            |
| 1 25 30     | 25-30   | 28.87   | 27.71 | 21.4                            |
| 1 50 55     | 50-55   | 29.26   | 26.56 | 21.7                            |
| 1 75 80     | 75-80   | 28.99   | 26.99 | 21.9                            |
| 1 0 5       | 90-95   | No data | 27.73 | 21.8                            |
| 2 25 30     | 115-120 | 28.93   | 27.42 | 21.9                            |
| 2 50 55     | 140-145 | 28.81   | 26.96 | 22.1                            |
| 2 75 80     | 165-170 | 28.80   | 26.06 | 22.1                            |
| 3 0 5       | 190-195 | 28.74   | 26.95 | 22.1                            |



|         |             |       |       |      |
|---------|-------------|-------|-------|------|
| 3 25 30 | 215-220     | 28.80 | 29.59 | 22.2 |
| 3 45 50 | 240-245     | 28.78 | 27.33 | 22.3 |
| 3 75 80 | 265-270     | 28.89 | 26.54 | 22.4 |
| 4 0 5   | 289.5-294.5 | 28.68 | 28.19 | 22.4 |
| 4 25 30 | 314.5-319.5 | 29.23 | 28.43 | 22.6 |
| 4 50 55 | 339.5-344.5 | 28.70 | 28.69 | 23.1 |
| 4 75 80 | 364.5-369.5 | 28.67 | 26.07 | 23.0 |
| 5 0 5   | 388.5-393.5 | 28.34 | 28.90 | 23.1 |
| 5 25 30 | 413.5-418.5 | 28.02 | 26.92 | 23.0 |
| 5 50 55 | 438.5-443.5 | 28.19 | 28.03 | 23.1 |
| 5 75 80 | 463.5-468.5 | 28.31 | 28.74 | 23.2 |

| <b>Core P12</b> | cm          | mM      | mM      | $\delta^{34}\text{S-SO}_4^{2-}$ |
|-----------------|-------------|---------|---------|---------------------------------|
| Supernatant     | 0           | 28.95   | 29.13   | 20.9                            |
| 1 0 5           | 0-5         | 20.03   | 20.03   | 37.2                            |
| 1 25 30         | 25-30       | 13.88   | 14.11   | 51.6                            |
| 1 50 55         | 50-55       | 11.35   | 11.13   | 55.2                            |
| 1 75 80         | 75-80       | 7.91    | 9.03    | 62.0                            |
| 2 0 5           | 99.5-104.5  | 6.12    | 0.07    | 16.8                            |
| 2 25 30         | 124.5-129.5 | 4.33    | 4.36    | 70.7                            |
| 2 50 55         | 149.5-154.5 | 0.41    | 2.70    | 78.4                            |
| 2 75 80         | 174.5-179.5 | 1.68    | 1.99    | 83.9                            |
| 3 0 5           | 198.5-203.5 | 0.74    | 0.09    | 44.0                            |
| 3 25 30         | 223.5-228.5 | 0.71    | 0.03    | 24.6                            |
| 3 50 55         | 248.5-253.5 | 2.54    | 0.08    | 28.0                            |
| 3 75 80         | 273.5-278.5 | 0.69    | No data | No data                         |
| 4 0 5           | 298.5-303.5 | No data | 0.15    | 20.1                            |
| 4 25 30         | 323.5-328.5 | 0.79    | 0.03    | 29.2                            |
| 4 50 55         | 348.5-353.5 | 0.67    | 0.02    | 30.1                            |
| 4 75 80         | 373.5-378.5 | 0.54    | No data | No data                         |
| Core catcher    | 394.5-404.5 | 0.37    | 0.02    | 18.8                            |

#### D) Sulfide

Data for each core are listed [from left to right] by sample number, actual sediment depth in cm, and concentration in micromolar.

| <b>CORE P6</b> | cm   | $\mu\text{M}$ |
|----------------|------|---------------|
| 1              | 2.5  | 1310          |
| 2              | 27.5 | 2553          |
| 3              | 52.5 | 4161          |

|    |       |      |
|----|-------|------|
| 4  | 77.5  | 3173 |
| 5  | 102.5 | 4151 |
| 6  | 127.5 | 2551 |
| 7  | 152.5 | 2818 |
| 8  | 177.5 | 5196 |
| 9  | 202.5 | 5453 |
| 10 | 227.5 | 5539 |
| 11 | 252.5 | 5853 |
| 12 | 277.5 | 3440 |
| 13 | 302.5 | 6196 |
| 14 | 327.5 | 5696 |
| 15 | 352.5 | 5810 |
| 16 | 377.5 | 3173 |
| 17 | 405.5 | 4796 |

| <b>CORE P10</b> | cm    | $\mu\text{M}$ |
|-----------------|-------|---------------|
| 1               | -2    | 2.5           |
| 2               | 2.5   | 27.5          |
| 3               | 27.5  | 52.5          |
| 4               | 52.5  | 16.25         |
| 5               | 77.5  | 40            |
| 6               | 101.5 | 48.75         |
| 7               | 126.5 | 91.25         |
| 8               | 151.5 | 40            |
| 9               | 176.5 | 92.5          |
| 10              | 201.5 | 38.75         |
| 11              | 226.5 | 61.25         |
| 12              | 251.5 | 60            |
| 13              | 276.5 | 58.75         |
| 14              | 300.5 | 65            |
| 15              | 325.5 | 30            |
| 16              | 350.5 | 32.5          |
| 17              | 375.5 | 80            |
| 18              | 398   | 83.75         |

| <b>Core P11</b> | cm   | $\mu\text{M}$ |
|-----------------|------|---------------|
| 1               | -2   | not detected  |
| 2               | 2.5  | not detected  |
| 3               | 27.5 | not detected  |
| 4               | 52.5 | 1.5           |

|    |       |              |
|----|-------|--------------|
| 5  | 77.5  | not detected |
| 6  | 92.5  | not detected |
| 7  | 97.5  | not detected |
| 8  | 142.5 | not detected |
| 9  | 167.5 | not detected |
| 10 | 192.5 | 1.5          |
| 11 | 217.5 | not detected |
| 12 | 242.5 | not detected |
| 13 | 267.5 | 5.25         |
| 14 | 292   | 0.25         |
| 15 | 317   | 1.5          |
| 16 | 342   | 25.25        |
| 17 | 367   | 50.25        |
| 18 | 400   | 65.25        |
| 19 | 416   | 69           |
| 20 | 441   | 72.75        |
| 21 | 466   | 82.75        |

| <b>Core P12</b> | <b>cm</b> | <b>μM</b> |
|-----------------|-----------|-----------|
| 1               | -2        | 632       |
| 2               | 2.5       | 768       |
| 3               | 27.5      | 5428      |
| 4               | 52.5      | 6188      |
| 5               | 77.5      | 7848      |
| 6               | 102       | 3848      |
| 7               | 127       | 9548      |
| 8               | 152       | 9468      |
| 9               | 177       | 10588     |
| 10              | 201       | 10248     |
| 11              | 226       | 10308     |
| 12              | 251       | 9148      |
| 13              | 276       | 8708      |
| 14              | 301       | 1988      |
| 15              | 326       | 8008      |
| 16              | 351       | 8728      |
| 17              | 376       | 8748      |
| 18              | 399.5     | 7048      |

**Supplementary Data 6.** Numbers and relative proportions (%) for sequences of methanogenic, methane-oxidizing and sulfate-reducing microbial lineages in the v4/v5 Miseq 16S rRNA gene dataset obtained from Guaymas Basin piston-cored sediments, based on the taxonomy pipeline SILVA v. 119 in VAMPS (*Huse et al.* 2014a) and on reanalysis with MOTHUR and SILVA v. 132 (see methods). “Desulfarculaceae” indicates a heterogeneous and variable pipeline classification that is not supported by phylogenetic analysis of representative sequences using PAUP (*Swofford* 2000); members of the *Desulfatiglans* lineage are also subsumed under this designation.

| <b>MOTHUR<br/>(SILVA 132)</b>              | <b>P03_4</b>   | <b>P04_3</b> | <b>P06_3</b>     | <b>P06_4</b>     | <b>P10_2</b>   | <b>P10_4</b>   | <b>P11_2</b>   | <b>P11_5</b> | <b>P12_4</b>   | <b>P13_4</b>   |
|--------------------------------------------|----------------|--------------|------------------|------------------|----------------|----------------|----------------|--------------|----------------|----------------|
| Methanocellales                            | 146<br>(0.14)  | 54<br>(0.06) | 103<br>(0.11)    | 60<br>(0.06)     | 156<br>(0.16)  | 47<br>(0.05)   | 39<br>(0.04)   | 0<br>(0)     | 19<br>(0.02)   | 46<br>(0.03)   |
| Methanosarcinaceae                         | 29<br>(0.03)   | 51<br>(0.06) | 37<br>(0.03)     | 95<br>(0.10)     | 18<br>(0.02)   | 0<br>(0)       | 0<br>(0)       | 0<br>(0)     | 3<br>(<0.01)   | 58<br>(0.04)   |
| Methermicoccaceae                          | 9<br>(<0.01)   | 1<br>(<0.01) | 0<br>(0)         | 0<br>(0)         | 29<br>(0.10)   | 9<br>(0.01)    | 6<br>(<0.01)   | 0<br>(0)     | 0<br>(0)       | 7<br>(<0.01)   |
| Methanosarcinales<br>[ANME -2a,b,c]        | 0<br>(0)       | 0<br>(0)     | 0<br>(0)         | 2<br>(<0.01)     | 9<br>(<0.01)   | 0<br>(0)       | 20<br>(0.02)   | 0<br>(0)     | 0<br>(0)       | 27<br>(0.02)   |
| Methanomicrobia<br>[ANME-1]                | 5<br>(<0.01)   | 7<br>(<0.01) | 11971<br>(12.33) | 16646<br>(17.15) | 10<br>(0.01)   | 0<br>(0)       | 4215<br>(4.00) | 35<br>(0.05) | 4607<br>(5.12) | 15<br>(0.01)   |
| “Desulfarculaceae”<br>incl. Desulfatiglans | 3320<br>(2.38) | No<br>data   | 1183<br>(0.86)   | 1147<br>(0.96)   | 1881<br>(2.27) | 3566<br>(2.72) | 3438<br>(2.33) | No<br>data   | 1351<br>(1.00) | 3112<br>(2.11) |
| Desulfobacteraceae                         | 530<br>(0.40)  | No<br>data   | 638<br>(0.47)    | 588<br>(0.50)    | 570<br>(0.69)  | 381<br>(0.29)  | 2214<br>(1.50) | No<br>data   | 76<br>(0.06)   | 1133<br>(0.79) |
| <b>VAMPS<br/>(SILVA 119)</b>               |                |              |                  |                  |                |                |                |              |                |                |
| Methanocellales                            | 101<br>(0.14)  | 41<br>(0.06) | 51<br>(0.06)     | 40<br>(0.05)     | 104<br>(0.15)  | 33<br>(0.05)   | 36<br>(0.05)   | 0<br>(0)     | 12<br>(0.02)   | 26<br>(0.03)   |
| Methanosarcinaceae                         | 18<br>(0.02)   | 30<br>(0.05) | 16<br>(0.02)     | 42<br>(0.05)     | 12<br>(0.02)   | 0<br>(0)       | 0<br>(0)       | 0<br>(0)     | 2<br>(<0.01)   | 32<br>(0.04)   |
| Methermicoccaceae                          | 71<br>(0.10)   | 45<br>(0.07) | 0<br>(0)         | 1<br>(<0.01)     | 70<br>(0.10)   | 45<br>(0.07)   | 103<br>(0.13)  | 21<br>(0.04) | 17<br>(0.02)   | 6<br>(<0.01)   |
| Methanosarcinales<br>[ANME-2a,b,c]         | 0<br>(0)       | 0<br>(0)     | 0<br>(0)         | 2<br>(<0.01)     | 7<br>(0.01)    | 0<br>(0)       | 19<br>(0.02)   | 0<br>(0)     | 0<br>(0)       | 19<br>(0.02)   |
| Methanomicrobia<br>[ANME-1]                | 14<br>(0.02)   | 14<br>(0.02) | 9798<br>(12.15)  | 13592<br>(16.84) | 11<br>(0.01)   | 0<br>(0)       | 3567<br>(4.65) | 44<br>(0.07) | 4591<br>(6.13) | 11<br>(0.01)   |
| “Desulfarculaceae”<br>incl. Desulfatiglans | 1461<br>(1.39) | No<br>data   | 811<br>(0.72)    | 762<br>(0.78)    | 791<br>(1.25)  | 1613<br>(1.64) | 2534<br>(2.16) | No<br>data   | 641<br>(0.60)  | 1353<br>(1.23) |
| Desulfobacteraceae                         | 578<br>(0.55)  | No<br>data   | 646<br>(0.58)    | 583<br>(0.59)    | 542<br>(0.86)  | 388<br>(0.39)  | 1941<br>(1.66) | No<br>data   | 153<br>(0.14)  | 1089<br>(0.99) |

**Supplementary Data 7. Listing of representative partial 16S rRNA gene sequences** used for inferring ANME and sulfate reducer phylogenies in Supplementary figures 9 and 10, in order of appearance from the top to the base of each tree. The sequence number [denovoXXXX] is followed by sediment sample [P11\_2 and P11\_5; P10\_2 and P10\_4], and the number of sequences within the same OTU [CT = counts], and phylogenetic affiliation. If an OTU occurs in multiple samples, these samples and their corresponding sequence counts are listed separately.

**ANME/Methanogen phylogeny, Suppl. Figure 9**

>denovo3767 P11\_2 CT14 [**ANME-2ab**]

```
GTCTAAAGGGTCTGTAGCCTGTTAATAAGTCTTTGGGAAATCTGGCAGCTTAACTGTCAGGCTGCTAAAGGATAC
TGTTAAACTTGGGACCGGGGACGTAGGGGGTACTCCAGGGGTAGGAGTGAAATCTTGAATCCCTGGGGGACCA
TCTGTGGCGAAGGCGCTTACGAGAACGGGTCCGACGGTGAGGGACGAAAGCTAGGGGAGCAAACCGGATTAGA
TACCCGGGTAGTCTAGCTGTAAACGATGCTCGCTAGGTGTCCGGCACGGTGCCTCCGTGTCTGGTGCCGCAGGGA
AGCCGTTAAGCGAGCCACCTGGGAAGTACGGTTCGCAAGGCTGAAACTTAAAGGAATTGGCGGGGGGCACTACAA
CGGGTGGAGCCTGCGGTGTAATTGGACTCAACGCCGG
```

>denovo2035 P10\_2 CT09 / P11\_2 CT4 [**ANME-2c**]

```
GTCTAAAGCGTTCGTAGCCGGTTTGGTAAGTCTCTGGAAAATCTGGTTGCTCAACAATCAGACTGCCAAGGGATAC
TGTCGAACTTGAGACCGGGAGAGGTAAGAGGTAAGTACTCAGGGGTAGGAGTGAAATCTTGAATCCCTGGGGGACCA
TCTGTGGCGAAGGCGTCTTACCAGAACGGGTCTGACGGTGAGGGACGAAAGCTGGGGGCGCGAACC GGATTAGAT
ACCCGGGTAGTCCCAGCCGTAAACGATGCTCGCTATGTGTCAGGTACGGTGCACCGTATCTGGTGCCGTAGGGAA
GCCGTGAAGCGAGCCACCTGGGAAGTACGGCCGCAAGGCTGAAACTTAAAGGAATTGGCGGGGGAGCACTACAAC
GGGTGGAGCCTGCGGTTAATTGGAATCAACGCCGG
```

>denovo13073 P10\_2 CT11 [**genus Methanosarcina**]

```
GTCTAAAGGGTCTGTAGCCGGTTTGGTCAAGTCTCCGGAAAATCTGATAGCTCAACTATTAGGCTTTCCGGGGGATAC
TGCCAGACTTGGAAACCGGGAGAGGTAAGAGGTAAGTACTACAGGGGTAGGAGTGAAATCTTGAATCCCTGTGGGACCA
CCTGTGGCGAAGGCGTCTTACCAGAACGGGTTCGACGGTGAGGGACGAAAGCTGGGGGCACGAACC GGATTAGAT
ACCCGGGTAGTCCCAGCCGTAAACGATGCTCGCTAGGTGTGAGGCATGGCGCGACCGTGTCTGGTGCCGCAGGGAA
GCCGTGAAGCGAGCCACCTGGGAAGTACGGCCGCAAGGCTGAAACTTAAAGGAATTGGCGGGGGAGCAACAACAA
CGGGTGGAGCCTGCGGTTAATTGGATTCAACGCCGG
```

>denovo13373 P11\_2 CT37 [**Methanocellales**]

```
GTCTAAAGTGTCTGTAGCCGGTTCGGCAAGTCCCTTGGGAAAATCTGACGGCTTAAACGGTTAGGCGTCCAGGGGATA
CTACCGAACTTGGGACCGGGAGAGGTAAGAGGTAAGTACTCCGGGGGTAGGGGTGAAATCCTGTAATCCTTGGGGGACC
ACCGGTGGCGAAGGCGTCTTACCAGAACGGGTCCGACGGTGAGGGACGAAAGCTAGGGGCACGAACC GGATTAG
ATACCCGGGTAGTCTAGCCGTAAACGATGCGGGGTAGGTGTACAGTAGCCATGTGTTGCTGTGGTGCCGCAGGG
AAACCGTGAAGCCTGCCGCTTGGGAAGTACGTCCGCAAGGATGAAACTTAAAGGAATTGGCGGGGGAGCACTACA
ACGGGTGGAGCCTGCGGTTAATTGGACTCAACGCCGG
```

>denovo3955 BSKE9 P10\_2 CT122 / P10\_4 CT32 [**Methanocellales**]



GCCTAAAGCATCCGTAGCCGGCTCGGCAAGTCTCTTGGGAAATCTGACGGCTTAACCGTCGGGCGTCCAGGGGATA  
CTACCGGGCTTGGGACCGGGAGAGGTAGGAGGTAACCGGGGTAGGGGTGAAATCCTGTAATCCTCGGGGGACC  
ACCGGTGGCGAAGGCGTCTACCAGAACGGCTCCGACGGTGAGGGACGAAAGCTAGGGGCACGAACCGGATTAG  
ATACCCGGGTAGTCTAGCCGTAACGATGCGGGCTAGGTGTACAGGTAGCCATGTGCTGCCGTGGTGCCGAGGG  
AAACCGTGAAGCCTGCCGCTTGGGAAGTACGTCCGCAAGGATGAACTTAAAGGAATTGGCGGGGGAGCACTACA  
ACGGGTGGAGCCTGCGGTTTAATTGGACTCAACGCCGG

>denovo12316 P10\_4 CT13 [Methanocellales]

GTCTAAAGGGTCTGTAGCCGGCCCGAAAGTCCCTTGGGAAATCTGTGCGCTTAACCGACAGGCGTTCAGGGGATA  
CTACCGGGCTTGGGACCGGGAGAGGTAGGAGGTAACCGGGGTAGGGGTGAAATCCTGTAATCCTCGGGGGACC  
ACCGGTGGCGAAGGCGTCTACCAGAACGGCTCCGACGGTGAGGGACGAAAGCTAGGGGCACGAACCGGATTAG  
ATACCCGGGTAGTCTAGCCGTAACGATGCGGGCTAGGTGTACAGGTAGCCATGTGCTGCTGTGGTGCCGAAGGG  
AAACCGTGAAGCCTGCCGCTTGGGAAGTACGTCCGCAAGGATGAACTTAAAGGAATTGGCGGGGGAGCACTACA  
ACGGGTGGAGCCTGCGGTTTAATTGGATTCAACGCCGG

>denovo10768 P10\_2 CT12 [Methanocellales]

GTCTAATTCGTAGCCGGCCTGCCAGTCCCTTGGGAAATCTAGCGGCTTAACCGTTAGGCGTCCAGAGGATACTACC  
AGGCTTGGGACCGGGAGAGGTAGGAGGTACCCAGGGGTAGGGGTGAAATCCTGTAATCCTTGGGGGACCACCG  
GTGGCGAAGGCGTCTACCAGAACGGCTCCGACGGTGAGGGACGAAAGCTAGGGGCACGAACCGGATTAGATACC  
CGGGTAGTCTAGCCGTAACGATGCAGGCTAGGTGTACAGGTAGCCATGAGCTATTGTGGTGCCGAGGAAAACC  
GTGAAGCCTGCCGCTTGGGAAGTACGTCCGCAAGGATGAACTTAAAGGAATTGGCGGGGGAGCACTACAACGGG  
TGGAGCCTGCGGTTTAATTGGAATCAACGCCGG

>denovo13609 Methermicoccus P11\_2 CT63 [uncultured lineage]

GTCTAAAGGGTCTGTAGCCTGTCCAGCCAGTCCGTTGGGAAATCTGACAGCTTAAGTGTGAGGCTGCTAAGGGATAC  
TGTTGGACTTGGGACCGGGAGAGGCTAGAGGTAACCGGGGTAGGAGTGAATCCTGTGATCCTTGAAGGACCA  
CCGGTGGCGAAGGCGTCTAGCTAGAACGGCTCCGACGGTGAGGGACGAAAGCTAGGGGCACGAACGGGATTAGA  
TACCCCGGTAGTCTAGCCGTAACGATGTGAGCTAGGTGTACAGCTTTCTGCGAGAGAGGCTGGTGCCGTAGGGA  
AGCCGTGAAGCTCACCGCTGGGAAGTACGGTCGCAAGGCTGAACTATATGAAGTGGACTTCATGCGTTTGCTTCA  
TTAGCAGCAAATTAAGGAATTGGCGGGGGAGCACTACAACGGGTGGATGTGCGGTTTAATTGGAATCAACGCC  
GG

>denovo12503 P10\_2 CT10 [uncultured lineage]

GCTTAAAGCGTTCGTAGCCGGTCCAGCCAGTCCGTTGGGAAATCTGCCGGCTTAACCGTCAGGCTGCTCAGGTATAC  
TGCTGGACTTGGGACCGGGAGAGGCTAGAGGTAACCGGGGTAGGAGTGAATCCTGTGATCCTTGAAGGACCG  
CCGGTGGCGAAGGCGTCTAGCTAGAACGGTCCGACGGTGAGGGACGAAAGCTAGGGGCACGAACGGGATTAGA  
TACCCCGGTAGTCTAGCCGTAACGATGTGAGCTAGGTGTACAGCTTTCTGCGAGGGAGGCTGGTGCCGTAGGGA  
AGCCGTGAAGCTCACCGCTGGGAAGTACGGTCGCAAGGCTGAACTTAAAGGAATTGGCGGGGGAGCACTACAA  
CGGGTGGATGCCGCGTTAATTGGAATCAACGCCGG

>denovo13341 P10\_2 CT35 / P10\_4 CT12 / P11\_2 CT42 [uncultured lineage]

GCCTAAAGCGTTCGTAGCCGGTCCAGCCAGTCCCTTGGGAAATCTGACGGCTTAACCGTCAGGCTGCTAAGGGATAC  
TGCTGGACTTGGGACCGGGAGAGGCTAGAGGTAACCGGGGTAGGAGTGAATCCTGTGATCCTTGAAGGACCA  
CCGGTGGCGAAGGCGTCTAGCTAGAACGGTCCGACGGTGAGGGACGAAAGCTAGGGGCACGAACGGGATTAGA  
TACCCCGGTAGTCTAGCCGTAACGATGCGAGCTAGGTGTACAGCTTTCTGCGAGAGAGGCTGGTGCCGTAGGGA

AGCCGTGAAGCTCGCCACCTGGGAAGTACGGTCGCAAGGCTGAACTTAAAGGAATTGGCGGGGGAGCACTACAA  
CGGGTGGATGCTGCGGTTAATTGGACTCAACGCCGG

>denovo11053 P11\_5 CT23 [uncultured lineage]

GTCTAAAGTGTCCGTAGCCTGTCCAGCCAGTCCTTTGTGAAATCTGACCGCTTAACTGTCAGGCTGCTAGGGGATAC  
TGCTGGACTCGGGACCGGGAGAGGCTAGAGGTATTTAGGGGTAGGAGTGAAATCCTGTAATCCTTGAAGGACCG  
CCGGTGGCGAAGGCGTCTAGCTAGAACGGTCCGACGGTGAGGGACGAAAGCTAGGGTCACGAACGGGATTAGA  
TACCCCGGTAGTCCTAGCCGTAACGATGCGAGCTAGGTGTCAGCCTTTCTGCGAGAGAGGCTGGTGCCGTAGGGA  
AGCCGTGAAGCTCGCCACCTGGGAAGTACGGTCGCAAGGCTGAAACCACATGAAGTATACTTTATGAGCTTGCCTC  
ATTGGCAGCAAATTAAGGAATTGGCGGGGGAGCACTACAACGGGTGGATGCTGCGGTTAATTGGATTCAACGC  
CGG

>denovo9206 P11\_2 CT59 [uncultured lineage]

GTCTAAAGGGTCTGTAGCCGGCCTAGCAAGTCCTTTGGGAAATCTGGCAGCTTAACTGTCAGGATGCTAAAGGATA  
CTACTGGGCTTGGGACCGGGTGAAGGCTAGAGGTACCCAGGGGTAGCGGTGAAATGCTGTAATCCTTGGGGGACT  
ATCAGTGGCGAAGGCGTCTAGCCAGAACGGTCCGACGGTGAGGGACGAAAGCTAGGGGGCGGAACGGGATTAG  
ATACCCGGTAGTCCTAGCCGTAACGATGCGAGCTTTGTGTCGGCCTCGACGCGATCGGGGTGGTGCCGTAGGG  
AAGCTGTTAAGCTCGCCACCTGGGGAGTATGGTCGCAAGACTGAACTTAAAGGAATTGGCGGGGGAGCACCACA  
ACGGGTGGAGCCTGCGGTTCAATTGGAATCAACGCCGG

>denovo17179 P11\_2 CT366 [ANME-1 / ANME-1b]

GTCTAAAGGGTCTGTAGCCGGCCAAGTAAAGTTCTTTGGGAAATTTGACCGCTTAACTGTCAGGATGCTAAAGGATA  
TGCTTGGCTTGGGACCGGGAGAGGTGAGAGGTACTCCAAGGGTAGGGGTGAAATCCGTTAATCCTTGGGGGACCA  
CCGGTAGCGAAGGCGTCTGACCAGACCGGGTCCGACGGTGAGGGACGAAAGGCTAGGGTCGCGAACCAGGATTAGA  
TACCCGGGTAGTCCTAGCTGTAACGATGCGGGCCAGGTGTTGGCATTACTGCGAGTGATGCCAGTGCCGAAGGG  
AGCCGTTAAGCCCGCCATCTGGGGAGTACGGTCGCAAGGCTGAACTTAAAGGAATTGGCGGGGGAGCACCACAA  
CGGGTGGAGCTTGGGTTCAATTGGAATCAACGCCGG

>denovo6418 P11\_2 CT115 [ANME-1 / ANME-1b]

GCTTAAAGTGTTCGTAGTCGGCCGGGTAAGTTCTTTGGGAAATTTGACCGCTTAACTGTCAGGATGCTAAAGGATA  
TGCTTGGCTTGGGACCGGGAGAGGTGAGAGGTACTCCAAGGGTAGGGGTGAAATCCATTAATCCTTGGGGGACCA  
CCGGTAGCGAAGGCGTCTGACCAGACCGGGTCCGACGGTGAGGGACGAAAGGCTAGGGTCGCGAACCAGGATTAGA  
TACCCGGGTAGTCCTAGCTGTAACGATGCGGGCCAGGTGTTGGCATTACTGCGAGTGATGCCAGTGCCGAAGGG  
AAGCCGTTAAGCCCGCCATCTGGGGAGTACGGTCGCAAGGCTGAACTTAAAGGAATTGGCGGGGGAGCACCACA  
ACGGGTGGAGCTTGGGTTCAATTGGAATCAACGCCGG

>denovo15530 P11\_2 CT71 [ANME-1 / ANME-1b]

GTCTAACGCGTTCGTAGCCGGCCGGGTAAGTTCTTTGGGAAATTTGACCGCTTAACTGTCAGGATGCTAAAGGATA  
TGCTTGGCTTGGGACCGGGAGAGGTGAGAGGTACTCCACGGGTAGGGGTGAAATCCATTAATCCTTGGGGGCCA  
CCGGTAGCGAAGGCGTCTGACCAGACCGGGTCCGACGGTGAGGGACGAAAGGCTAGGGTCGCGAGCCGATTAGA  
TACCCGGGTAGTCCTAGCTGTAACGATGCGGGCCAGGTGTTGGCATTACTGCGAGTGATGCCAGTGCCGAAGGG  
AGCCGTTAAGCCCGCCATCTGGGGAGTACGGTCGCAAGGCTGAACTGAAAGGAATTGGCGGGGGAGCACCACAA  
CGGGTGGAGCTTGGGTTCAATTGGAATCAACGCCGG

>denovo4844 P11\_2 CT42 [ANME-1/ANME-1b]

GCCTAAAGCATCCGTAGCCGGCCGGGTAAGTTCCTTGTGAAATTTGACCGCTTAACGGTCAAGCTTTCAGGGAATAC  
TGCTTGGCTTGGGACCGGGAGAGGTGACGGTACTCCAAGGGTAGGGGTGAAATCCATTAATCCTTGGGGGACCA  
CCGGTAGCGAAGGCGTCGGACCAGACCGGTCCGACGGTGAGGGGCGAAGGCTAGGGTCGCGAACCGGATTAGA  
TACCCTGGTAGTCTAGCTGTAACGATGCGGGCCAGGTGTTGGCATTACTGCGAGTGATGCCAGTGCCGAAGGGA  
AGCCGTTAAGCCTGCCATCTGGGGAGTACGGTCGCAAGGCTGAACTTAAAGGAATTGGCGGGGGAGCACCACAA  
CGGGTGGAGCTTGCGGTTCAATTGGAATCAACGCCGG

>denovo9885 P11\_2 CT3424 P11\_5 CT47 [ANME-1]

GCCTAAAGCATCCGTAGCCGGCTGAGTAAGTTCCTTGGGAAATTTGACCGCTTAACGGTAAAGCTATCAGGGAATAC  
TGCTTGGCTTGGGACCGGGAGAGGTGACGGTACTCCAGGGTAGGGGTGAAATCTATTAATCCTTGGGGGACCA  
CCGGTAGCGAAGGCGTCGACCAGACCGGTCCGACGGTGAGGGACGAAGGCTGGGGTCGCGAACCGGATTAGA  
TACCCGGTAGTCCCAGCTGTAACGATGCGGGCCAGGTGTTGGCATTACTGCGAGTGATGCAGTGCCAAAGGGA  
AGCCGTTAAGCCCGCATCTGGGGAGTACGGTCGCAAGGCTGAACTTAAAGAAATTGGCGGGGGAGCACCACAA  
CGGGTGGAGCTTGCGGTTCAATTGGACTCAACGCCGG

### **Sulfate-reducing deltaproteobacterial phylogeny, Suppl. Figure 10**

>denovo7591 P11\_2 CT10 [Seep-SRB1a]

CCAGCAGCTGCGGTAACACGGAGGGTGCAAGCGTTATTCGGAATTATTGGGCGTAAAGGGCGCGCAGGCGGTCTT  
TTAAGTCAGCTGTGAAAGCCCGGGGCTCAACCCCGGAAGTGCATTTGAACTAAGGGACTTGAGTATGGGAGAGG  
GAAGTGAATTCCTGGTGTAGAGGTGAAATTCGTAGATATCAGGAGGAACACCGGTGGCGAAGGCGACTTCCTGG  
ACCAATACTGACGCTGAGGCGCGAAGGCGTGGGGAGCAAACAGGATTAGATACCCTGGTAGTCCACGCAGTAAAC  
GGGGAACACTAGGTGTAGCGGGTATTGACCCTGCTGTGCCGCAGTTAACGAATTAAGTGTCCGCCTGGGGAGTA  
CGACCGCAAGGTTAAAACCAAAGGAAGTGACGG

>denovo2662 P11\_2 CT52 [Seep-SRB1]

CCAGCAGCTGCGGTAACACGGAGGGTGCAAGCGTTATTCGGAATTATTGGGCGTAAAGGGCGCGTAGGCGGTCTT  
TAAGTCAGATGTGAAAGCCCGGGGCTTAACCCCGGAAGTGCATTTGAACTAAGGGACTTGAGTATGGGAGAGGG  
AAGTGAATTCCTGGTGTAGAGGTGAAATTCGTAGATATCAGGAGGAACACCGGTGGCGAAGGCGACTTCCTGGA  
CCAATACTGACGCTAAGGCGCGAAGGCGTGGGGAGCAAACAGGATTAGATACCCTGGTAGTCCACGCAGTAAACG  
ATGAACACTAGGTGTAGCGGGTATTGACCCTGCGGTGCCGCAGTTAACGCATTAAGTGTCCGCCTGGGGAGTAC  
GACCGCAAGGTTAAAACCAAACGAATTGACGG

>denovo6456 P10\_2 CT180 / P10\_4 CT84 / P11\_2 CT446 [Desulfosarcinaceae]

CCAGCAGCTGCGGTAACACGGGGGGTGCAAGCGTTATTCGGAATTATTGGGCGTAAAGGGCGCGTAGGCGGTCTC  
TTAAGTCAGATGTGAAAGCCCGGGGCTTAACCCCGGAAGTGCATTTGAACTAAGGGACTTGAGTATGGGAGAGG  
GAAGTGAATTCCTGGTGTAGAGGTGAAATTCGTAGATATCAGGAGGAACACCGGTGGCGAAGGCGACTTCCTGG  
ACCAATACTGACGCTAAGGCGCGAAGGCGTGGGGAGCAAACAGGATTAGATACCCTGGTAGTCCACGCAGTAAAC  
GGTGAACACTAGGTGTAGCGGGTATTGACCCTGCTGTGCCGCAGTTAACGCATTAAGTGTCCGCCTGGGGAGTA  
CGGTGCGAAGATTAAAAACCAAACGAATTGACGG

>denovo8687 P11\_2 CT26 [Desulfosarcinaceae]

CGAGCAGCCCGGTAATACGGGGGGTGCAAGCGTTATTCGGAATTATTGGGCGTAAAGGGCGCGCAGGCGGCCTC  
TTAAGTCAGATGTGAAAGCCCGGGGCTTAACCCCGGAAGTGCATTTGAACTAAGGGGCTTGAGTATGGGAGAGG  
GAAGTGAATTCCTGGTGTAGCGGTGAAATGCGTAGATATCAGGAGGAACACCGGTGGCGAAGGCGGCTTCCTGG  
ACCAATACTGACGCTGAGGCGCGAAGGCGTGGGGAGCAAACAGGATTAGATACCCTGGTAGTCCACGCAGTAAAC

GGTGAACACTAGGTGTAGCGGGTATTGACCCCTGCTGTGCCGCAGCTAACGCATTAAGTGTCCGCCTGGGGAGTA  
CGATCGCAAGATTA AAACTCAAAGAAATTGACGG

>denovo7466 P10\_2 CT11 [Desulfosarcinaceae]

CCAGCAGCTGCGGTAATACGGGGGGTGCAGCGTTATTCCGGAATTATTGGGCGTAAAGGGCGCGTAGGCCGGCTTC  
TTAAGTCAGATGTGAAAGACCGGGGCTTAACCCCGGAAGTGCATTTGAAACTAAGAGGCTTGAGTTGGGAGAGG  
GAAGTGGAAATCCTGGTGTAGAGGGTAAATTCGTAGATATCAGGAGGAACACCGGTGGCGAAGGCGACTTCCTGG  
ACCAATACTGACGCTGATGCGCGAAGGCGTGGGGAGCAAACAGGATTAGATACCCTGGTAGTCCACGCAGTAAAC  
GGTGAACACTAGGTGTAGCGGGTATTGACCCCTGCGGTGCCGCAGTTAACGCATTAAGTGTCCGCCTGGGGAGTA  
CGACCCGAAGGTTAAACTCAAAGAAATTGACGG

>denovo11126 P10\_2 CT18 [Desulfosarcinaceae]

CCAGCAGCTGCGGTAATACGGGGGGTGAAGCGTTATTCCGGAATCACTGGGCGTAAAGAGCGCGTAGGCCGGTCTC  
TTAAGTCAGATGTGAAAGCCCGGGGCTCAACCCCGGAAGTGCATTTGAAACTAAGGGACTTGAGTATGGGAGAGG  
GAAGTGGAAATCCTGGTGTAGCGGTGAAATTCGTAGATATCAGGAGGAACACCGGTGGCGATGGCGACTTCCTGG  
ACCAATACTGACGCTGAGGCGCGAAGGCGTGGGGAGCAAACAGGATTAGATACCCTGGTAGTCCACGCAGTAAAC  
GTTGAACACTAGGTGTAGCGGGTATTGACCCCTGCTGTGCCGCAGCTAACGCATTAAGTGTCCGCCTGGGGAGTA  
CGGCCGAAGGCTAAACTCAAAGAATTGACGG

>denovo7630 P10\_2 CT11 [Desulfosarcinaceae]

CCAGCAGCTGCGGTAACACGGAGGGTGAAGCGTTATTCCGGAATCACTGGGCGTAAAGAGCGCGTAGGCCGGTTTC  
TAAAGTCAGATGTGAAAGCCCGGGGCTTAACCCCGGAAGAGCATTGAAACTTAGGGACTTGAGTATGAGAGAGG  
GAAGTGGAAATCCTGGTGTAGCGGTGAAATTCGTAGATATCAGGAGGAACACCGGTGGCGAAGGCGACTTCCTGG  
ACCAATACTGACGCTGAGGCGCGAAGGCGTGGGGAGCAAACAGGATTAGATACCCTGGTAGTCCACGCAGTAAAC  
GTTGAACACTAGGTGTAGCGGGTATTGACCCCTGCTGTGCCGCAGCTAACGCATTAAGTGTCCGCCTGGGGAGTA  
CGGCCGAAGGCTAAACTCAAAGGAATGACGG

>denovo10919 P10\_2 CT30 / P10\_4 CT32 / P11\_2 CT15 [Desulfosarcinaceae]

CCAGCAGCTGCGGTAACACGGAGGGTGAAGCGTTATTCCGGAATTATTGGGCGTAAAGAGCGCGTAGGTGGTCTCT  
TAAGTCAGATGTGAAAGCCTTCCGCTTAACCGAAGAAGTGCATTTGAAACTAAGAGACTTGAGTATGGGAGAGGGA  
AGTGGAAATCCTGGTGTAGAGGTGAAATTCGTAGATATCAGGAGGAACACCGGTGGCGAAGGCGACTTCCTGGAC  
CAATACTGACGCTGAGGCGCGAAGGCGTGGGGAGCAAACAGGATTAGATACCCTGGTAGTCCACGCAGTAAACGG  
TGAACACTAGGTGTAGCGGGTATTGACCCCTGCTGTGCCGCAGTTAACGCATTAAGTGTCCGCCTGGGGAGTACG  
ACCGCAAGGTTAAACTCAAACGAATTGACGG

>denovo2205 P11\_2 CT10 [Desulfosarcinaceae]

CCAGCAGCCGCGGTAATACGGGGGGTGAAGCGTTATTCCGGAATTATTGGGCGTAAAGAGCGCGTAGGCCGGTTTT  
GTAAGTCAGATGTGAAAGCCCGGGGCTTAACCCCGGAAGTGCATTTGAAACTACAGGACTTGAGTATGGGAGAGG  
GAAGTGGAAATCCTGGTGTAGAGGTGAAATTCGTAGATATCAGGAGGAACACCGGTGGCGAAGGCGGCTTCCTGG  
ACCAATACTGACGCTGAGGCGCGAAGGCGTGGGTAGCAAACAGGATTAGATACCCTGGTAGTCCACGCAGTAAAC  
GGTGATCACTAGGTGTAGCGGGTATTGACCCCTGCTGTGCCGCAGTTAACGCATTAAGTGATCCGCCTGGGAAGTA  
CGATCGCAAGATTA AAACTCAAAGAAATTGACGG

>denovo7484 P10\_2 CT225 / P10\_4 CT253 / P11\_2 CT1353 [uncultured Desulfobacteraceae]

CCAGCAGCTGCGGTAATACGGAGGGTGAAGCGTTATTCGGAATTACTGGGCGTAAAGGGCGCGTAGGGCGGCTCC  
TTAAGTCAGGTGTGAAAGCCCGGGGCTCAACCCCGGAAGTGC GTTTGAACTAAGGAGCTTGAGTACGGGAGAGG  
GAAGTGAATTCCTGGTGTAGAGGTGAAATTCGTAGATATCAGGAGGAACACCGGTGGCGAAGGGCGACTTCCTGG  
ACCGATACTGACGCTAAGGCGCGAAAGCGTGGGGAGCAAACAGGATTAGAGACCCTGGTAGTCCACGCCGTAAAC  
GATGAACACTAGGTGTAGCGGGTATTGACCCCGCTGTGCCGTAGCTAACGCATTAAGTGTTCCGCCTGGGGACTA  
CGGTGCGAAGGCTAAAACCTCAAACGAATTGACGG

>denovo8688 P10\_2 CT16 [**uncultured Desulfobacteraceae**]

CCAGCAGCTGCGGTAAGACGGAGGGTGAAGCGTTATTCGGAATTACTGGGCGTAAAGGGCGCGTAGGGCGGTTCA  
TTAAGTCAGGCGTGAAAGACCCGGGGCTCAACCCCGGAAGTGC GTTTGAACTGAGGAGCTTGAGTACGGGAGAGG  
GAAGGGGAATTCCTGGTGTAGAGGTGAAATTCGTAGATATCAGGAGGAACACCGGTGGCGAAGGGCGACTTCCTGG  
ACCGATACTGACGCTGAGGCGCGAAAGCGTGGGGAGCAAACAGGATTAGAGACCCTGGTAGTCCACGCCGTAAAC  
GATGAACACTAGGTGTAGCGGGTATTGACCCCGCTGTGCCGTAGCTAACGCATTAAGTGTTCCGCCTGGGGACTA  
CGGCCGCAAGGCTAAAACCTAAAGGAATTGACGG

>denovo8573 P11\_2 CT60 [**uncultured Desulfobacteraceae**]

CCAGCAGCTGCGGTAACACGGAGGGTGAAGCGTTATTCGGAATTACTGGGCGTAAAGGGCGCGTAGGGCGGCTCT  
TTAAGTCAGGCGTGAAAGCCAGGGCTCAACCTCGGAAGTGC GTTTGAACTGAAGAGCTTGAGTACGGGAGAGG  
GAAGTGAATTCCTGGTGTAGAGGTGAAATTCGTAGATATCAGGAGGAACACCGGTGGCGAAGGGCGACTTCCTGG  
ACCGATACTGACGCTGAGGCGCGAAAGCGTGGGGAGCAAACAGGATTAGAGACCCTGGTAGTCCACGCCGTAAAC  
GATGAACACTAGGTGTAGCGGGTATTGACCCCTGCTGTGCCGCAGCTAACGCATTAAGTGTTCCGCCTGGGGACTA  
CGGTGCGAAGGCTAAAACCTCAAAGAAATTGACGG

>denovo10909 P10\_2 CT26 / P11\_2 CT55 [**uncultured Desulfobacteraceae**]

CCAGCAGCTGCGGTAATACGGAGGGTGAAGCGTTATTCGGAATTACTGGGCGTAAAGGGCGCGCAGGGCGGTTCC  
TTAAGTCAGGCGTGAAAGCCCGGGGCTAAACCTCGGAAGTGC GTTTGAACTAAGGGACTTGAGTACGGGAGAGG  
GAAGTGAATTCCTGGTGTAGAGGTGAAATTCGTAGATATCAGGAGGAACACCGGTGGCGAAGGGCGACTTCCTGG  
ACCGATACTGACGCTGAGGCGCGAAAGCGTGGGGAGCAAACAGGATTAGAGACCCTGGTAGTCCACGCCGTAAAC  
GATGAACACTAGGTGTAGCGGGTATTGAATCCTGCTGTGCCGCAGCTAACGCATTAAGTGTTCCGCCTGGGGACTA  
CGGTGCGAAGGCTAAAACCTCAAACGAATTGACGG

>denovo5431 P10\_2 CT14 / P10\_4 CT14 [**Desulfatiglans lineage**]

CCAGCAGCTGCGGTAACACGGAGGGTGAAGCGTTGTTTCGGAATTACTGGGCGTAAAGAGCGTGTAGGGCGGTTTG  
GCAAGTCAGATGTGAAAGCCCTGGGCTCAACCCCGGAAGTGC ATTTGAACTGCCATTTTAGAGTATGGGAGAGGA  
GAGTGAATTCAGTGTAGAGGTGAAATTCGTAGATATTGGGAGGAACACCGGTGGCGAAGGGCGACTCTCTGGAC  
CAATACTGACGCTGAGACGCGAAAGCGTGGGGAGCAAACAGGATTAGATACCCTGGTAGTCCACGCCGTAAACGA  
TGAGA ACTAGGTGTAGCGGGTATTGACCCCTGCTGTGCCGTAGCTAACGCATTAAGTACTCCGCCTGGGGAGTACG  
GTCGTAAGGCTAAAACCTAAAGGAATTGACGG

>denovo16261 P10\_2 CT11 [**Desulfatiglans lineage**]

CCAGCAGCTGCGGTAATACGGAGGGTGAAGCGTTGTTTCGGAATTACTGGGCGTAAAGAGCGTGTAGGGCGGTTTG  
GCAAGTCAGATGTGAAAGCCCTGGGCTCAACCCAGGAAGTGC ATTTGAACTGCCATACTAGAGTATGGGAGAGG  
AGAGTGAATTCAGGCTGTAGCGGTGAAATTCGTAGATAGTGGGAGGAACACCGGTGGCGAAGGGCGACTCTCTGG  
ACCAATACTGACGCTGGGACGCGAAAGCGTGGGGAGCAAACAGGATTAGATACCCTGGTAGTCCACGCCGTAAAC  
GATGAGA ACTAGGTGTAGCGGGTATTGACCCCTGCTGTGCCGTAGCTAACGCATTAAGTACTCCGCCTGGGGAGTA  
CGGTGCGAAGGCTAAAACCTAAAAGAATTGACGG

>denovo14186 P10\_2 CT23 / P10\_4 CT39 [**Desulfatiglans lineage**]

CCAGCAGCCGCGGTAACACGGAGGGTGCAAGCGTTGTTCCGGAATTACTGGGCGTAAAGGGCGTGTAGGCGGTTTG  
GCAAGTCAGATGTGAAAGCCCTGGGCTCAACCCAGGAAGTGCATTTGAAACTGCCATACTTGAGTATGGGAGAGGA  
GAGTGGAAATTCGCGTGTAGAGGTGAAATTCGTAGATATTGAGAGGAACACCCGTGGCGAAGGCGACTCTCTGGAC  
CAATACTGACGCTGAGACGCGAAAGCGTGGGGAGCAAACAGGATTAGATACCCTGGTAGTCCACGCTGTAAACGAT  
GAGAAGTGGTGTAGCGGGTATTGACCCCTGCTGTGCCGAGCTAACGCATTAAGTTCTCCGCCTGGGGAGTACGG  
CCGCAAGGCTAAAACCTAAATGAATTGACGG

>denovo2861 P10\_2 CT83 / P10\_4 CT76 / P11\_2 CT328 [**Desulfatiglans lineage**]

CCAGCAGCTGCGGTAATACGGAGGGTGCAAGCGTTGTTCCGGAATTACTGGGCGTAAAGAGCGTGTAGGCGGTTTG  
GTAAGTCAGATGTGAAAGCCCTGGGCTCAACCCAGGAAGTGCATTTGAAACTGCCTTTCTTGAGTATGGGAGAGGA  
GAGTGGAAATTCAGTGTAGAGGTGAAATTCGTAGATATTGGGAGGAACACCCGTGGCGAAGGCGACTCTCTGGA  
CCAATACTGACGCTGAGACGCGAAAGCGTGGGGAGCAAACAGGATTAGATACCCTGGTAGTCCACGCCGTAAACG  
ATGAGAAGTGGTGTAGCGGGTATTGACCCCTGCTGTGCCGAAGTTAACGCATTAAGTTCTCCGCCTGGGGAGTAC  
GGCCGCAAGGCTAAAACCTAAACGAATTGACGG

>denovo11218 P11\_2 CT15 [**Desulfatiglans lineage**]

CCAGCAGCTGCGGTAATACGGAGGGTGCGAGCGTTGTTCCGGAATTACTGGGCGTAAAGGGCGTGCAGGCGTTATG  
GTAAGTCAGATGTGAAAGCCCTTCTGCTCAACGGAAGAAGTGCATTTGAAACTGCCATGCTTGAGTATGGGAGAGGA  
GAGTGGAAATTCAGTGTAGAGGTGAAATTCGTAGATATTGGGAGGAACACCCGTGGCGAAGGCGACTCTCTGGA  
CCAATACTGACGCTGAGACGCGAAAGCGTGGGGAGCAAACAGGATTAGATACCCTGGTAGTCCACGCCGTAAACG  
ATGAGAAGTGGTGTAGCGGGTATTGACCCCTGCTGTGCCGTAAGTTAACGCATTAAGTTCTCCGCCTGGGGAGTAC  
GGCCGCAAGGCTAAAACCTAAATGAATTGACGG

>denovo12378 P11\_2 CT10 [**Desulfarculaceae-assigned**]

GCGGTAACACGGAGGGTGCAAGCGTTATTCCGATTTATTGGGCGTAAAGAGCGTGTAGGCGGTTGGGTTAGTCAG  
ATGTGAAATCCTTCTGCTCAACAGAAGAAGTACGTCTGAAACTGCCAAGCTTGAGTACGAGAGAGGAAAGTGGAGT  
TCCCAGTGTAGAGGTGAAATTCGTAGATATTGGGAGGAACACCTGTGGCGAAGGCGACTTTCTGGATCGATACTGA  
CGCTGAGACGCGAAAGCGTGGGGAGCAAAACAGGATTGGATACCCGGGTGGTCCACGCCGTAAACGATGGGAACTG  
GGTGTAGCGGGTATTGATCCCTGCTGTGCCGAAGCTAACGCATTAAGTTCCCCGCCTGGGGAGTACGGTCGCAAGG  
CTAAAACCTAAATGAATTGACGG

>denovo3371 P10\_2 CT72 / P10\_4 CT127 / P11\_2 CT31 [**Desulfarculaceae-assigned**]

GCGGTAACACGGAGGGTGCAAGCGTTATTCCGATTTATTGGGCGTAAAGAGCGTGTAGGCGGTTGGGTTAGTCAG  
ATGTGAAATCCTTCTGCTCAACAGAAGAAGTACGTCTGAAACTGCCAAGCTTGAGTACGAGAGAGGAAAGTGGAGT  
TCCCAGTGTAGAGGTGAAATTCGTAGATATTGGGAGGAACACCTGTGGCGAAGGCGACTTTCTGGATCGATACTGA  
CGCTGAGACGCGAAAGCGTGGGGAGAAAAACAGGATTAGATACCCTGGTAGTCCACGCCGTAAACGATGGGAACTA  
GGTGTAGCGGGTATTGATCCCTGCGGTGCCGAAGCTAGCGCATTAAAGTTCCCCGCCTGGGGAGTACGGTCGCAAGG  
CTAAAACCTAAACGAATTGACGG

>denovo2296 P10\_4 CT13 [**Desulfarculaceae-assigned**]

CCAGCAGCTGCGGTAGTACGGAGGGTGCAAGCGTTATTCCGATTTATTGGGCGTAAAGAGCGTGTAGGCGGTTGG  
GTTAGTCAGATGTGAAATCCTTCTGCTCAACAGAAGAAGTACGTCTGAAACTGCCAAGCTTGAGTACGAGAGAGGA  
AAGTGGAAATTCAGTGTAGAGGTGAAATTCGTAGATATTGGGAGGAACACCTGGGGCGAAGGCGACTTTCTGGAT  
CGATACTGACGCTGAGACGCGAAAGCGTGGGGAGCAAACAGGATTAGATACCCTGGTAGTCCACGCCGTAAACGA



TGGGAAGTGGTGTAGCGGGTATTGATCCCTGCGGTGCCGAAGCTAACGCATTAAGTCCCCGCCTGGGGAGTACG  
GTCGCAAGGCTAAAATTCAAAGGAATAGACGG

>denovo2942 P10\_4 CT10 [Desulfarculaceae-assigned]

CCAGCAGCTGCGGTAATACGGAGGGTGAAGCGTTATTCCGATTTATTGGGCGTAAAGAGCGTGTAGGCGTTGG  
GTTAGTCAGATGTGAAATCCTTCTGCTCAACAGAAGAAATACGTCTGAAACTACCCAACCTTGAGTACGAGAGAGGA  
AAGTGGAAATCCCAAGTGTAGAGGTAAAATTCGTAGATATTGGGAGGAACACCTGTGGCGAAGGCGACTTTCTGGAT  
CGATACTGACGCTGGGACGCGAAAGCGTGGGTAGCAAACAGGATTAGATACCCTGGTAGTCCACGCCGTAAACGAT  
GGGAACTAGGTTAGCGGGGATTGATCCCTGCTGTGCCGAGTTAACGCATTAAGTCCCCGCCTGGGGAGTACGG  
TCGCAAGGCTAAAATTCAAAGGAATAGACGG

>denovo7215 P10\_4 CT10 [Desulfarculaceae-assigned]

CCAGCAGCCGCGGTAACACGGAGGGTGAAGCGTTATTCCGATTTATTGGGCGTAAAGAGCGTGTAGGCGTTGG  
GTTAGTCAGATGTGAAATCCTTCTGCTCAACAGAAGAAGTACGTCTGAAACTACCCAACCTTGAGTACGAGAGAGGG  
AAGTGGAAATCCCAAGTGTAGAGGTGAAATTCGGAGATATTGGGAGGAACACCTGTGGCGAAGGCGACTTTATGGA  
TTGATACTGACGCTGAGACGCGAAAGCGTGGGTAGCAAACAGGATTAGATACCCTGGTAGTCCACGCCGTAAACGA  
TGGGAAGTGGTGTAGCGGGGATTGATCCCTGCTGTGCCGAGTTAACGCATTAAGTCCCCGCCTGGGGAGTACG  
GTCGCAAGGCTAAAATTCAAAGAAATTGACGG

>denovo5906 P10\_2 CT20 / P10\_4 CT108 [Desulfarculaceae-assigned]

CCAGCAGCTGCGGTAACACGGAGGGTGAAGCGTTATTCCGATTTATTGGGCGTAAAGAGCGTGTAGGCGTTTG  
GTTAGTCAGATGTGAAATCCTTCTGCTCAAGTGAAGAAGTACGTCTGAAACTACCTAACCTTGAGTACGAGAGAGGA  
AAGTGGAAATCCCAATGTAGAGGTGAAATTCGTAGATATTGGGAGGAACACCTGTGGCGAAGGCGACTTTCTGGAT  
CGATACTGACGCTGAGACGCGAAAGCGTGGGGAGCAAACAGGATTAGATACCCTGGTAGTCCACGCCGTAAACGA  
TGGGAAGTGGTGTAGTGGGTATTGATCCCTGCGGTGCCGAAGCTAACGCATTAAGTCCCCGCCTGGGGAGTACG  
GTCGCAAGGCTAAAATTCAAAGAATTGACGG

>denovo2340 P10\_2 CT25 / P10\_4 CT75 / P11\_2 CT47 [Desulfarculaceae-assigned]

CCAGCAGCCGCGGTAATACGGAGGGTGAAGCGTTATTCCGATTTATTGGGCGTAAAGAGCGTGTAGGTGGTCAG  
GTCAGTCAGATGTGAAATCCTTCCGCTCAAGGGAAGAAGTACGTCTGAAACTACCTGACTTGAGTACGAGAGAGGA  
AAGTGGAAATCCCAAGTGTAGAGGTGAAATTCGTAGATATTGGGAGGAACACCTGTGGCGAAGGCGACTTTCTGGAT  
CGATACTGACGCTGAGACGCGAAAGCGTGGGGAGCAAACAGGATTAGATACCCTGGTAGTCCACGCCGTAAACGA  
TGGGAAGTGGTGCAGCGGGTATTGATCCCTGCTGTGCCGAAGCTAACGCATTAAGTCCCCGCCTGGGGAGTACG  
GTCGCAAGGCTAAAATTCAAAGAATTGACGG

>denovo15603 P10\_2 CT14|P10\_4 CT14 [Desulfarculaceae-assigned]

TCAGCAGCCGCGGTAATACGGAGGGTGCAGCGTTATTCCGATTTATTGGGCGTAAAGAGCGTGTAGGCGTTGG  
GTTAGTCAGATGTGAAATCCTTCTGCTCAAGTGAAGAAGTGCATCTGAAACTACCCAACCTTGAGTACGAGAGAGGA  
AAGTGGAAATCCAGGGTAGAGGTGAAATTCGTAGATATTGGGAGGAACACCTGTGGAGAAGGCGACTTTCTGGA  
TCGATACTGACGCTGAGACGCGAAAGCGTGGGGAGCAAACAGGATTAGATACCCTGGTAGTCCACGCCGTAAACG  
ATGGGAAGTGGTGTAGTGGGTATTGAGCCCTGCTGTGCCGAAGCTAACGCATTAAGTCCCCGCCTGGGGAGTAC  
GGTCGCAAGGCTAAAATTAAACGAATTGACGG

>denovo5856 P10\_4 CT29 [Desulfarculaceae-assigned]

GCGGTAACACGGAGGGTGCAGCGTTATTCGGATTTATTGGGCGTAAAGAGCGTGTAGGCGGTTGGGTTAGTCAG  
ATGTGAAATCCTTCTGCTCAACGGAAGAAGTGCATCTGAAACTACCCGACTTGAGTACGAGAGAGGAAGGTGGAAT  
TCCCAGTGTAGAGGTGAAATTCGTAGATATTGGGAGGAACACCTGTGGCGAAGGCGACTTTCTAGATCGATACTGA  
CGCTGAGATGCGAAAGCGTGGGGAGAAAACAGGATTAGATACCCTGGTAGTCCACGCCGTAAACGATGGGAACTA  
GGTGTAGCGGGTATTGATCCCTGCGGTGCCGGAGTTAACGCATTAAGTTCCCCGCCGGGGGAGTACGGTCGCAAG  
GCTAAAACCTAAATGAATTGACGG

>denovo11131 P10\_2 CT31 / P10\_4 CT13 [Desulfarculaceae-assigned]

CCAGCGCCGCGTAATACGGAGGGTGCAGCGTTATTCGGATTTATTGGGCGTAAATAGCGTGTAGGCGGTTTGGT  
TAGTCAGATGTGAAATCCTTCTGCTCAACGGAAGAAGGGCATCTGAAACTACCTGACTTGAGTACGAGAGAGGAAA  
GTGGAATCCCAGTGTAGAGGTGAAATTCGTAGATATTGGGAGGAACATCTGTGGCGAAGGCGACTTTCTAGATCG  
ATACTGACGCTGAGACGCGAAAGCGTGGGTAGCAAACAGGATTAGATACCCTGGTAGTCCACGCCGTAAACGATG  
GGAAGTGGTGTAGCGGGTATTGATCCCTGCTGTGCCGGAGTTAACGCATTAAGTTCCCCGCTGGGGAGTACGGT  
CGCAAGGCTAAAACCTAAATGAATTGACGG

>denovo13505 P104B CT31 [Desulfarculaceae-assigned]

CCAGCAGCTGCGTAATACGGAGGGTGCAGCGTTATTCAGATTTATTGGGCGTAAAGAGCGTGTAGGCGGTTTAG  
TTAGTCAGATGTGAAATCCTTCTGCTCAACGGAAGAAGTGCATCTGAAACTGCCCACTTGAGTACGAGAGGGGAA  
AGTGGAAATCCCAGTGTAGAGGTGAAATTCGTAGATATTGGGAGGAACACCTGTAGCGAAGGCGACTTTCTGGATC  
GATACTGACGCTGAGATGCAAAGCGTGGGGAGCAAACAGGATTAGATACCCGGGTAGTCCACGCCGTAAACGAT  
GGGAACTAGGTGTAGCGGGTATTGATCCCTGCTGTGCCGGAGTTAACGCATTAAGTTCCCCGCTGGGGAGTACGG  
TCGCAAGGCTAAAACCTAAAAGAATTGACGG

>denovo8635 P10\_2 CT13 / P10\_4 CT27 [Desulfarculaceae-assigned]

CCAGCAGCTGCGTAATACGGAGGGTGAAGCGTTATTCGGATTTATTGGGCGTAAAGAGCGTGTAGGCGGTTTG  
GTTAGTCAGATGTGAAATCCTTCTGCTCAACAGAAGAAGTACGTCTGAAACTGCTCAACTTGAGTACGGGAGAGGA  
AAGTGGAAATCCCAGTGTAGAGGTGAAATTCGTAGATATTGGGAGGAACACCTGTGGCGAAGGCGACTTTCTGGAT  
CGATACTGACGCTGGGACGCGAAAGCGTGGGGAGCAAAGGGGATTAGATACCCGGGTAGTCCACGCCGTAAACGA  
TGGGAACTAGGTGTAGCGGGTATTGATCCCTGCGGTGCCGAAGTTAACGCATTAAGTTCCCCGCTGGGGAGTACG  
GTCGCAAGGCTAAAACCTCAAATGAATTGACGG

>denovo3340 P10\_2 CT31 / P10\_4 CT51 [Desulfarculaceae-assigned]

CCAGCAGCTGCGTAATACGGAGGGTGAAGCGTTATTCGGATTTATTGGGCGTAAAGAGCGTGTAGGCGGTTTG  
GTTAGACAGATGTGAAATCCTTCTGCTCAACAGAAGAAGTACGTCTGAAACTGCTCAACTTGAGTACGAGAGAGGA  
AAGTGGAAATCCCAGTGTAGAGGTGAGATTCGTAGATATTGCGAGGAACACCTGTGGCGAAGGCGACTTTCTGGAT  
CGATACTGACGCTGAGACGCGAAAGCGGGGGGAGAAAACAGGATTAGATACCCTGGTAGTCCACGCCGTAAACGA  
TGGGAACTAGGTGTAGCGGGTATTGATCCCTGCGGTGCCGAAGTTAACGCATTAAGTTCCCCGCTGGGGAGTACG  
GTCGCAAGGCTAAAACCTCAAAGAAATTGACGG

>denovo8703 P10\_4 CT15 [Desulfarculaceae-assigned]

CCAGCAGCCGCGTAACACGGAGGGTGAAGCGTTATTCGGATTTATTGGGCGTAAAGAGCGTGTAGGCGGTTTG  
GTTAGTCAGATGTGAAATCCTTCTGCTCAACAGAAGAAGTACGTCTGAAACTGCTCAACTTGAGTACGGGAGAGGA  
AAGTGGAAATCCCAGGGTAGAGGGGAAATTCGTAGATATTGGGAGGAACACCTGTGGCGAAGGGGACTTTCTGGA  
TCGATACTGACGCTGGGACGCGAAAGGGTGGGGAGCAAACAGGATTAGATACCCTGGTAGTCCACGCCGTAAACG  
ATGGGAACTAGGTGTAGCGGGTATTGATCCCTGCGGTGCCGAAGTTAACGCATTAAGTTCCCCGCTGGGGAGTAC  
GGTCGCAAGGCTAAAACCTCAAAGAAATTGACGG

>denovo15352 P10\_2 CT25 / P10\_4 CT35 [Desulfarculaceae-assigned]

CCAGCAGCCGCGGTAACACGGAGGGTGCAAGCGTTATTCGGGTTTATTGGGCGTAAAGAGCGTGTAGGCGGTTTG  
GTTAGTCAGATGTGAAATCCTTCTGCTCAACAGAAGAAGTACGTCTGAAACTGCTCAACTTGAGTACGAGAGAGGA  
AAGTGGAAATCCCAATGTAGAGGTGAAATTCGTAGATATTGGGAGGAACACCTGTGGCGAAGGCGACTTTCTGGAT  
CGATGCTGACGCTGAGCCGCGAAAGCGTGGGGAGCAAACAGGATTATATACCCTGGTAGCCCACGCCGTAACCGAT  
GGGAACTAGGTGTAGCGGGTATTGATCCCTGCTGTGCCGAAGTTAACGCATTAAGTTCCCCGCCTGGGGAGTACGG  
TCGCAAGGCTAAAACCTCAAAGGAATTGACGG

>denovo2122 P10\_2 CT28 / P10\_4 CT31 [Desulfarculaceae-assigned]

CCAGCAGCTGCGGTAACACGGAGGGTGCAAGCGTTATTCGGATTTATTGGGCGTAAAGAGCGTGTAGGCGGTTGG  
GTTAGTCAGATGTGAAATCCTTCTGCTCAACAGAAGAAGTACGTCTGAACTGCTCAACTTGAGTACGAGAGAGGA  
AAGTGGAAATCCCAATGTAGAGGTGAAATTCGTAGATATTGGGAGGAACACCTGTGGCGAAGGCGACTTTCTGGAT  
CGATACTGACGCTGGGACGCGAAAGCGTGGGGAGCAAACAGGTTTAAAATCCCTGGTAGTCCACGCCGTAACCGAT  
GGGAACTAGGTGTAGCGGGTATTGATCCCTGCTGTGCCGAAGTTAACGCATTAAGTTCCCCGCCTGGGGAGTACGG  
TCGCAAGGCTAAAACCTCAAACGAATTGACGG

>denovo5131 P10\_2 CT22 / P10\_4 CT27 [Desulfarculaceae-assigned]

CCAGCAGCTGCGGTAAGACGGAGGGTGCAAGCGTTATTCGGATTTATTGGGCGTAAAGAGCGTATAGGCGGTTTG  
GTTAGTCAGATGTGAAATCCTTCTGCTCAACAAAAGAAGTACGTCTGAAACTGCTCAACTTGAGTACGAGAGAGGA  
AAGTGGAAATCCCAATGTAGAGGTGAAACTCGTAGATATTGGGAGGAACACCTGTGGCGAAGGCGACTTTCTGGAT  
CGATACTGACGCTGAGACGCGAAAGCGTGGGGAGCAAACAGGATTAGATACCCTGTTAGTCCACGCCGTAACCGAT  
GGGAACTAGGTGTAGCGGGTATTGATCCCTGCTGTGCCGAAGTTAACGCATTAAGTTCCCCGCCTGGGGAGTACGG  
TCGCATGGCTAAAACCTCAAAGAATTGACGG

>denovo9277 P10\_4 CT18 [Desulfoarculaceae-assigned]

CCAGCAGCTGCGGTAACACGGAGGGTGCAAGCGTTATTCGGATTTATTGGGCGTAAAGAGCGTGTAGGCGGTTTG  
GTTAGTCAGATGTGAAATCCTTCTGCTCAACCGCAGAAGTACGTCTGAAACTGCTCAACTTGAGTACGAGAGAGGAA  
AGTGGAAATCCCAAGTGTAGCGGTGAAATTCGTAGATATTGGGAGGAACACCTGTGGCGAAGGCGACTTACTGGATC  
GATACTGACGCTGAGACGCGAAAGCGTGGGGAGCAAACAGGATTAGATACCCTGGTAGTCCACGCCGTAACCGAT  
GGGAACTAGGTGTAGCGGGTATTGACCCCTGCTGTGCCGAAGTTAACGCATTAAGTGCCCCGCCTGGGGAGTACGG  
TCGCAAGGCTAAAACCTCAAACGAATTGACGG

>denovo14994 P10\_2 CT905 / P10\_4 CT1457 / P11\_2 CT296 [Desulfarculaceae-assigned]

CCAGCAGCCGCGGTAATACGGAGGGTGCAAGCGTTATTCGGATTTATTGGGCGTAAAGAGCGTGTAGGCGGTTTG  
GTTAGTCAGATGTGAAATCCTTCTGCTCAACCGAAGAAGTACGTCTGAAACTGCTCAACTTGAGTACGAGAGAGGA  
AAGTGGAAATCCCAAGTGTAGAGGTGAAATTCGTAGATATTGGGAGGAACACCTGTGGCGAAGGCGACTTTCTGGAT  
CGATACTGACGCTGAGACGCGAAAGCGTGGGGAGCAAACAGGATTAGATACCCTGGTAGTCCACGCCGTAACCGA  
TGGGAACTAGGTGTAGCGGGTATTGATCCCTGCTGTGCCGAGTTAACGCATTAAGTTCCCCGCCTGGGGAGTACG  
GTCGCAAGGCTAAAACCTTAAAAGAATTGACGG

>denovo14641 P10\_2 CT87 / P10\_4 CT291 / P11\_2 CT2262 [Desulfarculaceae-assigned]

CCAGCAGCTGCGGTAATACGGAGGGTGCAAGCGTTATTCGGATTTATTGGGCGTAAAGAGCGTGTAGGTGGTTGG  
GATAGTCAGATGTGAAAGCCTTCTGCTCAACAGAAGAAGTACGTCTGAAACTACCAACTTGAGTACGAGAGAGGA  
AAGTGGAAATCCCAAGTGTAGAGGTGAAATTCGTAGATATTGGGAGGAACACCTGTGGCGAAGGCGACTTTCTGGAT  
CGATACTGACGCTGAGACGCGAAAGCGTGGGGAGCAAACAGGATTAGATACCCTGGTAGTCCACGCTGTAAACGA

TGGGAAGTGGTGTAGCGGGTATTGATCCCTGCTGTGCCGAAGCTAACGCATTAAGTCCCCGCCTGGGGAGTACG  
GTCGCAAGGCTAAAACCTCAAACGAATTGACGG

>denovo9700 P10\_4 CT12 [Desulfarculaceae-assigned]

CCAGCAGCTGCGGTAATACGGAGGGTGCAAGCGTTATTCGGATTATTGGGCGTAAAGCGCGTGTAGGCGTTGG  
GGTAGTCAGGTGTGAAAGCCTTCTGCTCAACAGAAGAAGTACATCTGGAAGTACCCGACTTGAGTACGAGAGAGGA  
AAGTGGAAATCCAGTGTAGAGGTGAAATTCGTAGATATTGGGAGGAAGACCTGTGGCGAAGGCGACTTTCTGGAT  
CGTTACTGACGCTGAGCCGCGAAAGCGTGGGGAGCAAACAGGATTAGATACCCTGGTAGTCCACGCCGTAACGAT  
GGGAAGTGGTGTAGCGGGTATTGATCCCTGCTGTGCCGAAGCTAACGCATTAAGTCCCCGCCTGGGGAGTACGG  
TCGCAAGGCTAAAACCTCAAAGAATTGACGG

>denovo16628 P10\_2 CT23 / P10\_4 CT281 / P11\_2 CT136 [Desulfarculaceae-assigned]

CCAGCAGCTGCGGTAACACGGAGGGTGCAAGCGTTATTCGGATTTATTGGGCGTAAAGAGCGTGTAGGCGTTAG  
GTCAGTCAGATGTGAAAGCCTTCTGCTCAACGGAAGAAGTGCATCTGAAACTACCTAAGTGTAGTACGGGAGAGGA  
AAGTGGAAATCCAGTGTAGAGGTGAAATTCGTAGATATTGGGAGGAACACCTGTGGCGAAGGCGACTTTCTGGAT  
CGATACTGACGCTGAGACGCGAAAGCGTGGGGAGCAAACAGGATTAGATACCCTGGTAGTCCACGCCGTAACGAT  
TGGGAAGTGGTGTAGCGGGTATTGATCCCTGCTGTGCCGAAGCTAACGCATTAAGTCCCCGCCTGGGGAGTACG  
GTCGCAAGGCTAAAACCTTAAAGGAATTGACGG

>denovo5030 P11\_2 CT12 [uncultured group]

CCAGCAGCCGCGGTAACACGGAGGGTGCAAGCGTTGTTCCGGAATCACTGGGCGTAAAGGGCGAGCAGGCGTTG  
GGTAAGTCAGGTGTGAAATCCCTAGGCTCAACCTAGGAAGTGCATTTGATACTGCCATCTTGAGTACGGGAGAGG  
GAGGCGGAATCCAGTGTAGAGGTGAAATTCGTAGATACTGGGAGGAACACCGGTGGCGAAGGCGGCCTCCTGG  
ACCGATACTGACGCTGAGGCGCGAAAGCGTGGGGAGCAAACAGGATTAGATACCCTGGTAGTCCACGCTGTAAC  
GGTGAGCACTAGGTGTAGCGGGTATTGACCCCTGCTGTGCCGTAGCTAACGCATTAAGTGTCCGCCTGGGGAGTA  
CGACCGCAAGGTTGAAACTCAAATGAATTGACGG
